# 1 **Extracellular Matrix Modulates Outgrowth Dynamics in Ovarian Cancer.**

2 Sarah Alshehri<sup>1\*</sup>, Tonja Pavlovič<sup>1\*</sup>, Sadaf Farsinejad<sup>1</sup>, Panteha Behboodi<sup>2</sup>, Li Quan<sup>2</sup>, Daniel  
3 Centeno<sup>1</sup>, Douglas Kung<sup>1</sup>, Marta Rezler<sup>3</sup>, Woo Lee<sup>1,2</sup>, Piotr Jasiński<sup>4</sup>, Elżbieta Dziabaszewska<sup>4</sup>,  
4 Ewa Nowak-Markwitz<sup>5</sup>, Dilhan Kalyon<sup>2</sup>, Mikołaj P. Zaborowski<sup>5\*\*</sup>, and Marcin Iwanicki<sup>1\*\*</sup>

5 <sup>1</sup> Department of Chemistry and Chemical Biology, Stevens Institute of Technology, Hoboken,  
6 USA

7 <sup>2</sup> Department of Chemical Engineering, Stevens Institute of Technology, Hoboken, USA

8 <sup>3</sup> Poznań University of Medical Sciences, Poznań, Poland

9 <sup>4</sup> Department of Pathology, Poznań University of Medical Sciences, Poznań, Poland

10 <sup>5</sup> Department of Gynecology, Obstetrics and Gynecologic Oncology, Division of Gynecologic  
11 Oncology, Poznań University of Medical Sciences, Poznań, Poland

12 \* These authors contributed equally.

13 \*\* Correspondence: [miwanick@stevens.edu](mailto:miwanick@stevens.edu) (lead contact) or [mzaborowski@ump.edu.pl](mailto:mzaborowski@ump.edu.pl)

14 **Keywords:** ovarian cancer, outgrowths, extracellular matrix, laminin  $\gamma 1$ , collagen, tumor  
15 microenvironment, ascites

## 16 **ABSTRACT**

17 Ovarian carcinoma (OC) forms outgrowths that extend from the outer surface of an afflicted  
18 organ into the peritoneum. OC outgrowth formation is poorly understood because there is  
19 limited availability of OC cell culture models to examine the behavior of cell assemblies that  
20 form outgrowths. Prompted by immunochemical evaluation of extracellular matrix (ECM)  
21 components, laminin  $\gamma 1$  and collagens, in human tissues representing untreated and  
22 chemotherapy-recovered OC, we developed laminin- and collagen-rich ECM-reconstituted cell  
23 culture models amenable to studies of cell clusters that can form outgrowths. We demonstrate  
24 that ECM promotes outgrowth formation in fallopian tube non-ciliated epithelial cells (FNE)  
25 expressing mutant p53-R175H and various OC cell lines. Outgrowths were initiated by cells  
26 that had undergone outward translocation and, upon mechanical detachment, could intercalate  
27 into mesothelial cell monolayers. Electron microscopy, optical coherence tomography (OCT),  
28 and small amplitude oscillatory shear experiments revealed that high ECM concentration  
29 increased ECM fibrous network thickness and led to high shear elasticity in the ECM  
30 environment. These physical characteristics were associated with the suppression of  
31 outgrowths. A culture environment with low ECM concentration mimicked viscoelasticity of

32 malignant peritoneal fluids (ascites) and supported cell proliferation, cell translocation, and  
33 outgrowth formation. These results highlight the importance of ECM microenvironments in  
34 modulating OC growth and could provide an additional explanation of why primary and  
35 recurrent ovarian tumors form outgrowths that protrude into the peritoneal cavity.

## 36 INTRODUCTION

37 Ovarian carcinoma (OC) can arise from the outer mucosa of the epithelial cell surfaces  
38 covering the reproductive organs including the endometrium,<sup>[1]</sup> ovary,<sup>[2]</sup> and fallopian tubes.<sup>[3]</sup>  
39 Within malignant tissue, transformed epithelial cells can form outgrowths capable of  
40 protruding away from the basement membrane and sub-epithelial stroma into the peritoneal  
41 cavity.<sup>[4]</sup> Outgrowths can detach, disseminate within malignant peritoneal fluid (ascites),  
42 superficially attach, and intercalate into the mesothelium, contributing to the disease  
43 progression.<sup>[5,6]</sup> The ascites contain ECM molecules<sup>[7]</sup> and ECM is also enriched within cell-  
44 cell junctions of detached tumor outgrowths.<sup>[8]</sup> Thus, investigating the contribution of ECM to  
45 processes associated with OC outgrowth formation would provide invaluable information  
46 about the mechanisms of disease progression.

47 ECM is a molecular scaffold that is rich in numerous glycosylated proteins including laminin  
48  $\gamma 1$ <sup>[9]</sup> and collagens<sup>[10]</sup> which, through interaction with cell surface receptors,<sup>[11]</sup> provide  
49 mechanical<sup>[12-15]</sup> and biochemical<sup>[16,17]</sup> cues competent in regulating tissue development<sup>[18,19]</sup>  
50 and malignant progression.<sup>[20,21]</sup> Recent histologic examination of OC outgrowths protruding  
51 from the fallopian tube demonstrates enrichment of laminin  $\gamma 1$  within tumor cells capable of  
52 forming outgrowths.<sup>[22]</sup> Consistent with these findings, it was previously reported<sup>[8]</sup> that  
53 detached human fallopian tube non-ciliated epithelial (FNE) cells expressing various p53  
54 mutations deposited ECM molecules supportive of both tumor survival and cell-ECM-cell  
55 adhesion. A recent study using second harmonic visualization of outgrowths arising in the  
56 fallopian tube revealed the presence of additional ECM components, collagens.<sup>[23]</sup> Collagen  
57 molecules were found to form fibrillar and wavy networks beneath basal surfaces of  
58 transformed epithelium. Taken together, these data provoked questions of whether constituents  
59 of the tumor microenvironment, such as ECM, regulate the dynamics of outgrowth-forming  
60 cell clusters.

61 Reconstitution of cell cultures with Matrigel® (MG), a basement membrane extract rich in both  
62 laminin and collagen, has become a standard approach<sup>[24]</sup> in studying the role of ECM in

63 cellular growth,<sup>[25]</sup> migration,<sup>[26]</sup> and death.<sup>[27]</sup> Recent studies<sup>[28–31]</sup> employed MG to grow OC  
64 cells to evaluate their response to treatments in the context of three-dimensional (3D) spheroid  
65 cultures, which resemble malignant tissue organization more closely than two-dimensional  
66 (2D) cell cultures. While these studies provided a static view of tumor cells with ECM  
67 reconstitution, the contribution of ECM to the dynamic process of OC growth remains  
68 unknown.

69 In this report, we have performed immunochemical evaluations of laminin  $\gamma$ 1 and collagens in  
70 OC representative of disease progression before and after chemotherapy. Similar to OC  
71 tumorigenesis from the fallopian tube,<sup>[22]</sup> we found that laminin  $\gamma$ 1 was associated with tumor  
72 cells, whereas collagens formed fibrillar networks within the surrounding microenvironment.  
73 These studies raised a question of whether ECM deposition within tumor cells and adjacent  
74 microenvironment contribute to OC outgrowth dynamics. To address this question, we  
75 deployed laminin- and collagen-rich (MG) ECM-reconstituted suspended or adhered cell  
76 culture models. To study the dynamics of OC cell clusters, live-cell imaging and quantitative  
77 image processing of cell proliferation and translocation were employed. We found that ECM  
78 reconstitution of suspended cell clusters induced outgrowths in FNE cells expressing mutant  
79 p53-R175H, the cells-of-origin for a significant subset of OCs, as well as other genetically  
80 distinct and well-established OC cell lines. Live-cell imaging revealed that outgrowths were  
81 initiated by cell clusters that had undergone outward translocation and, upon mechanical  
82 detachment, could intercalate into mesothelial cell monolayers – the most frequent physiologic  
83 sites of metastasis for OC. Increased ECM concentration altered the thickness of the fibrous  
84 network and the viscoelastic characteristics of the microenvironment, which led to the  
85 suppression of cell proliferation, directional cell translocation, and formation of outgrowths.  
86 Furthermore, ECM-reconstituted cultures that supported outgrowths, cell proliferation, and cell  
87 translocation mimicked the viscoelastic properties of peritoneal fluids (ascites).

88 Our results are consistent with a model whereby low-elasticity ECM microenvironments  
89 support cell proliferation and translocation of cell clusters that form outgrowths. Our data  
90 provide additional explanation of why primary and recurrent OCs favor forming outgrowths  
91 that protrude into peritoneal cavity, as opposed to breaching underlying collagen-dense tissues.

92

93

## 94 RESULTS

### 95 OC tumor outgrowths are associated with distinct ECM deposition.

96 Detached OC cell clusters deposit ECM on cell surfaces to support survival and cell-ECM- and  
97 cell-cell adhesion.<sup>[8]</sup> Pathologic<sup>[4]</sup> and genomic<sup>[32]</sup> examination of tumors indicate that the  
98 sources of detached OC cell assemblies are malignant outgrowths that can detach and  
99 disseminate into the peritoneal space from the surface of the fallopian tubes, ovaries, and the  
100 omentum. To examine whether OC outgrowths are associated with ECM deposition, we used

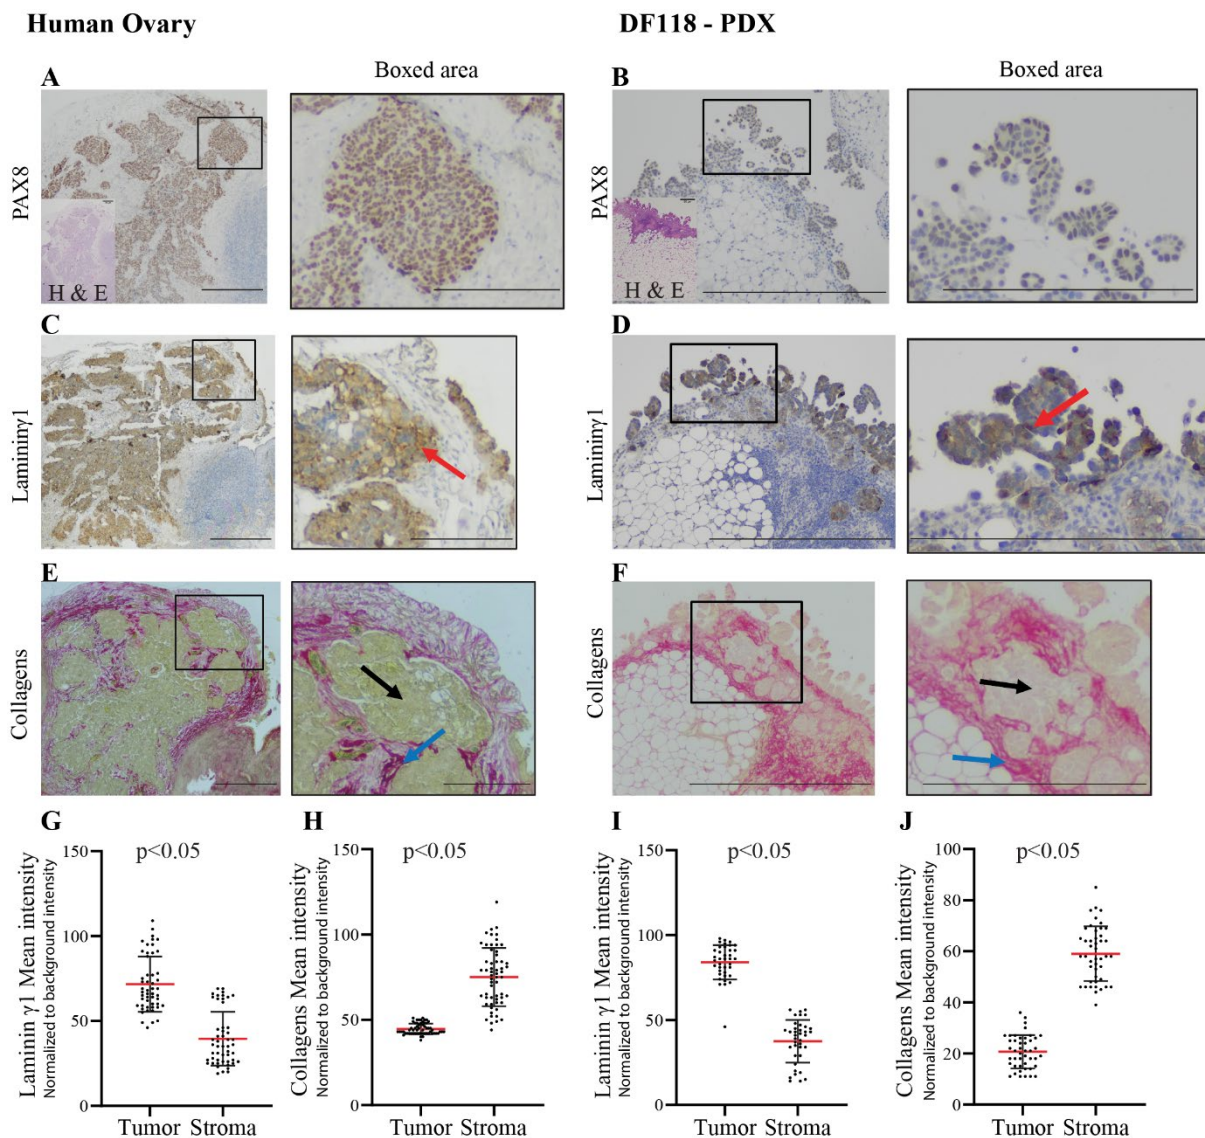

101 **Figure 1.** Immuno and chemical evaluation of laminin  $\gamma$ 1 and collagen. (A, B) PAX8-positive OC outgrowths,  
102 and PAX8-negative surrounding connective tissue. Representative images of laminin  $\gamma$ 1 (C, D), and collagen (E,  
103 F) expression in tumors protruding from human ovary (C, E), or in xenograft experiments, from the surface of  
104 the omentum (D, F). Red arrows point to the deposition of laminin  $\gamma$ 1. Blue arrows indicate fibrillar collagen  
105 structures within the tumor's connective tissue, whereas black arrows represent collagen deposition within tumors.

106 Quantification of laminin  $\gamma$ 1 (**G, I**) and collagen (**H, J**) expression in PAX8-positive tumor outgrowths and PAX8-  
107 negative surrounding tissue. Each data point represents one region of interest (ROI) within tumor outgrowth or  
108 surrounding stroma. In each group, G: 51, H: 59, I: 38, and J: 45 ROIs/ condition (tumor and stroma). All data  
109 points are shown with bars indicating mean  $\pm$  SD. An unpaired, two-tailed, non-parametric Mann-Whitney test  
110 was used to examine statistical differences between data sets. Intensity values are normalized to background level  
111 (area without tissue) after RGB image conversion to 8-bit gray scale (0-255 pixels range).<sup>[33]</sup> Bars are 100  $\mu$ m and  
112 50  $\mu$ m in boxed area.

113 combination of immunohistochemistry (IHC) for laminin  $\gamma$ 1 and picrosirius red staining for  
114 collagen.<sup>[34]</sup> This approach revealed that cell clusters, which were positive for OC marker  
115 PAX8, grew outward from the human ovary surface (**Figure 1A**), or protruded from the surface  
116 of the omentum in patient-derived xenograft (PDX) models of OC (**Figure 1B**). These OC  
117 outgrowths contained laminin  $\gamma$ 1 (**Figure 1C, D**) and, to a much lesser degree, collagens  
118 (**Figure 1E, F**). In the same tissue sections, we observed that the adjacent extra-tumoral  
119 connective space exhibited low laminin  $\gamma$ 1 levels but contained dense fibrillar collagen  
120 networks (**Figure 1C-F**). Quantitative image analysis of laminin  $\gamma$ 1 and collagen expression  
121 revealed differential patterns of localization. Laminin  $\gamma$ 1 was enriched within tumors (**Figure**  
122 **1G, I**), whereas collagens were enriched within the extra-tumoral space (**Figure 1H, J**). Taken  
123 together, these results demonstrate that OC outgrowths are associated with at least two ECM  
124 microenvironment factors, laminin  $\gamma$ 1 and collagens.

### 125 **Laminin $\gamma$ 1 and collagens are associated with OC tumors before and after chemotherapy.**

126 OC patients often develop recurrent disease, which is characterized by the continuous evolution  
127 of outgrowths and the presence of detached tumor clusters in the peritoneal cavity.<sup>[7]</sup> These  
128 clinical observations prompted us to examine whether chemotherapy-recovered tumors are  
129 associated with laminin  $\gamma$ 1 and a collagen-rich ECM microenvironment. ECM deposition was  
130 evaluated in PAX8-positive primary tumors in the ovary (**Figure 2A**) and matching omental  
131 metastases (**Figure 2B-C**), representing tumors before and after neoadjuvant chemotherapy.  
132 Examination of these tissue samples revealed laminin  $\gamma$ 1 and collagen deposition before and  
133 after chemotherapy (**Figure 2D-E**), suggesting that OC after chemotherapy is associated with  
134 the presence of laminin  $\gamma$ 1 and collagens. These findings support the idea that laminin and  
135 collagen-rich ECM could contribute to outgrowth dynamics of primary and recurrent tumors.

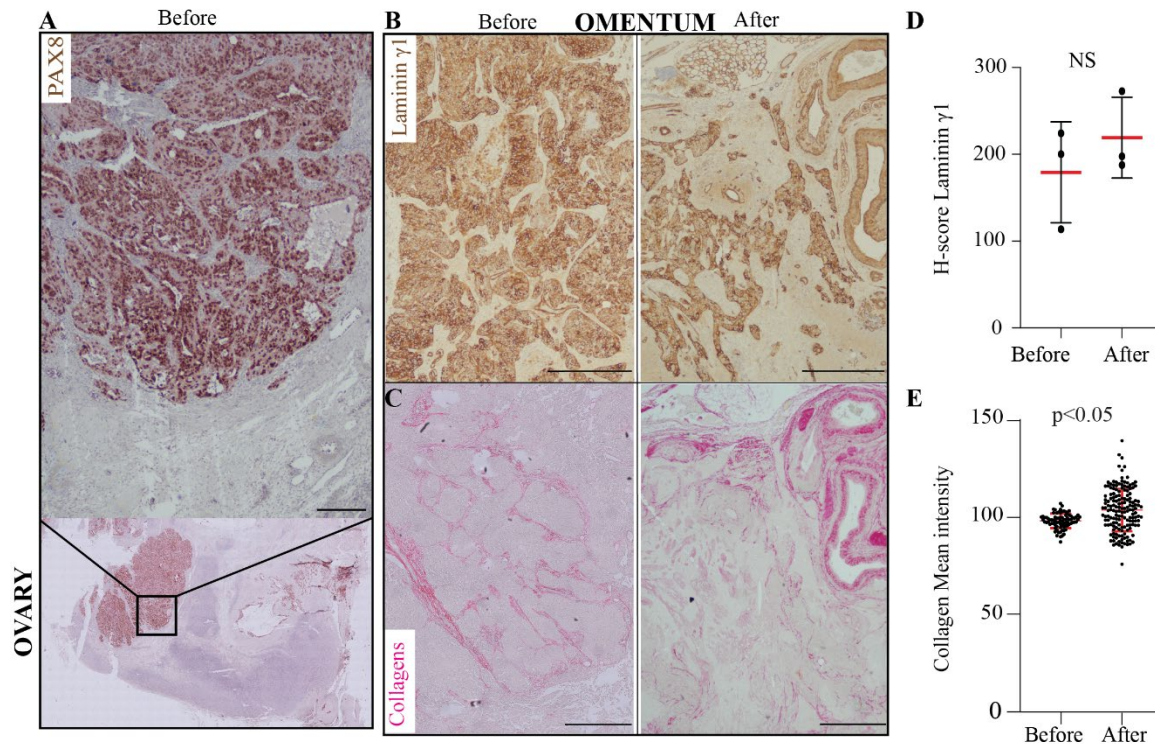

136 **Figure 2.** OC before and after chemotherapy is associated with spatially distinct laminin  $\gamma 1$  and collagen ECM  
137 microenvironments. (A) Hematoxylin and PAX8 stain of high-grade serous ovarian cancer (HGSOC) growing  
138 within the ovary before chemotherapy; bar is 100 $\mu$ m. (B) Laminin  $\gamma 1$  and (C) collagen deposition in matched  
139 omental tissue of HGSOC before and after chemotherapy; bar is 500 $\mu$ m. (D) H-score quantification of laminin  $\gamma 1$   
140 positivity in matched tissue samples representing HGSOC before and after taxane-platin therapy. Tissues were  
141 analyzed from three patients (n=3). Wilcoxon sum rank test was used to compare the difference between the  
142 groups, NS= Not-Statistically different. Data points are presented as mean  $\pm$  SD. (E) Quantification of collagen  
143 expression in omental metastases before and after chemotherapy. Each data point represents one region of interest  
144 (ROI); Before: 82 & After: 160 ROIs. All data points are shown with bars indicating mean  $\pm$  SD. An unpaired,  
145 two-tailed, parametric student t-test with Welch's correction was used to examine statistical differences between  
146 data sets. Intensity values are normalized to background level (area without tissue) after RGB image conversion  
147 to 8-bit grayscale (0-255 pixels range).<sup>[33]</sup>

#### 148 **ECM reconstitution in OC spheroids promotes outgrowths.**

149 Laminins (including laminin  $\gamma 1$ ) and collagens (including collagen IV) represent major  
150 scaffolding components of the basement membrane<sup>[35–37]</sup> and of the reconstituted basement  
151 membrane extract, Matrigel® (MG).<sup>[37]</sup> Thus, to mimic a laminin  $\gamma 1$  and collagen  
152 microenvironment associated with OC, we tested whether addition of MG would support  
153 formation of OC outgrowths in a suspended spheroid cell culture model. We initially examined  
154 effects of MG addition on outgrowth formation in normal fallopian tube non-ciliated epithelial  
155 cells expressing mutant p53 R175H (FNE-m-p53). We selected this cell line, because (1) non-  
156 ciliated fallopian tube cells, with mutations in the *TP53* gene, are thought to be precursor cells

157 of OC,<sup>[3]</sup> and (2) we have recently demonstrated, using this cell line, that expression of m-p53  
158 in FNE cells induces acquisition of transformed phenotypes associated with OC progression,  
159 such as survival of suspended spheroids and mesothelial intercalation.<sup>[8]</sup> Here, we examined  
160 the outgrowth-forming capabilities of FNE-m-p53 or FNE cells transduced with an empty  
161 control vector in an OC spheroid model. To obtain OC spheroids, we clustered OC cells in low-  
162 adhesion wells and allowed them to grow in suspension for 24 hours (**Figure 3A**). To mimic  
163 the laminin and collagen rich ECM microenvironment, we then embedded the OC spheroids in  
164 media containing 2% MG (**Figure 3A**). This ECM reconstitution condition of 2% MG was  
165 selected based on previous reports that 2% MG supported the growth of breast and ovarian  
166 spheroid cultures plated on MG layers covering flat culture surfaces.<sup>[27]</sup> Live-cell microscopy  
167 revealed that FNE-m-p53, but not wild-type FNE, significantly expanded and formed  
168 outgrowths – cell assemblies that, over time, began to extend beyond the main spheroid  
169 structure (**Figure 3B-C, and MOVIE 1**). We observed that FNE-m-p53 spheroids in 2% MG  
170 formed outgrowths with an average frequency of 30%, whereas no outgrowths were detected  
171 in spheroids composed of control FNE cells in 2% MG, or FNE-m-p53 spheroids lacking MG

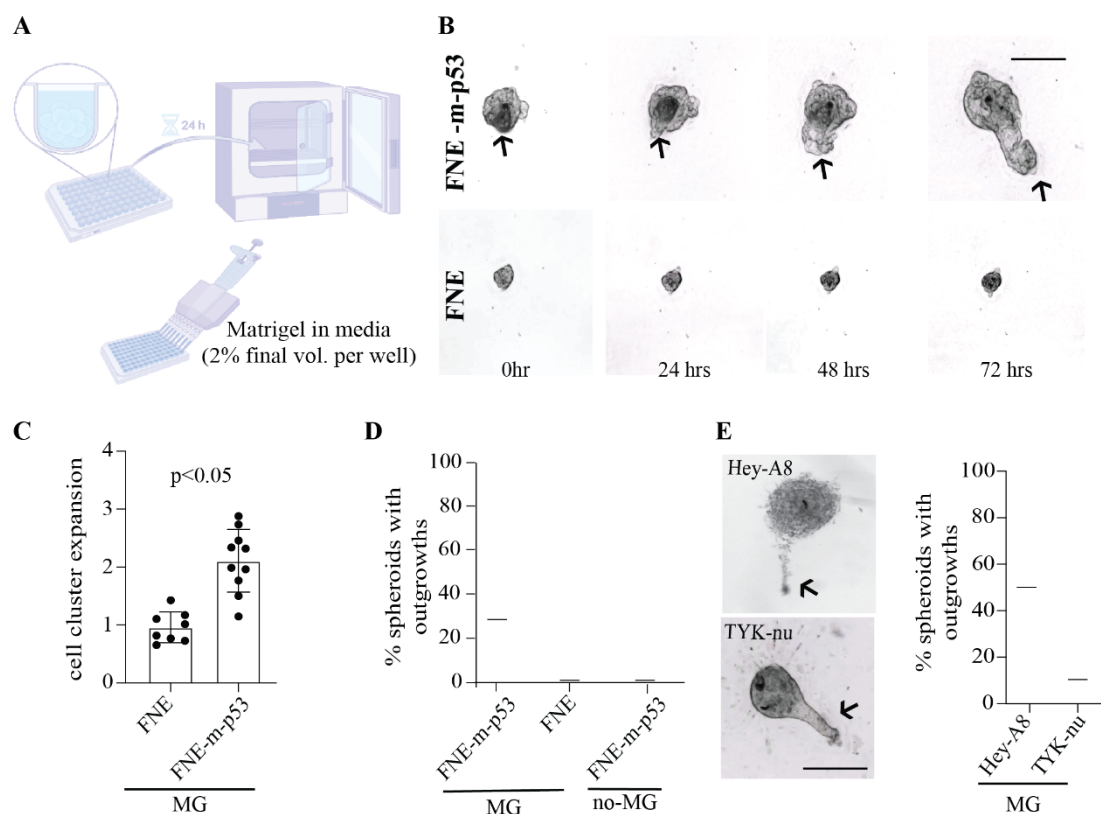

172 **Figure 3.** Laminin- and collagen-rich ECM reconstitution stimulates outgrowths in suspended cultures of various  
173 OC cells. **(A)** Graphical representation of the assay design to study outgrowth dynamics. **(B)** Representative  
174 bright-field images of outgrowth formation in FNE cells expressing plasmid containing m-p53R175H (FNE-m-  
175 p53), or control plasmid, and cultured as suspended clusters reconstituted with 2% MG. Cell structures were  
176 cultured for 7 days before imaging and subsequently followed for an additional 72 hrs. **(C)** Quantification of 3D

177 structure (spheroid) expansion, where each dot represents fold change in area, over 72 hrs of filming time, in a  
178 spheroid. Total spheroids: 8 for FNE & 10 for FNE-m-p53. All data points are shown with bars indicating mean  
179  $\pm$  SD. An unpaired, two-tailed, parametric student t-test with Welch's correction was used to examine statistical  
180 differences between data sets. **(D)** Quantification of cell clusters with outgrowths in FNE-m-p53 or FNE cells.  
181 Bar represents an average percentage of outgrowth formation with at least 30 cell clusters analyzed. **(E)**  
182 Representative bright-field images of outgrowths in Hey-A8 and TYK-nu ovarian cancer cell lines, and  
183 quantification of outgrowths in Hey-A8 or TYK-nu. Bars represent an average percentage of outgrowth formation  
184 in three independent experiments with 20-30 spheroids scored per experiment. Scale bars are 200  $\mu$ m.

185 embedding **(Figure 3D)**. These data are consistent with the implicated role of ECM deposition  
186 in supporting outgrowth development **(Figure 1 and Figure 2)**.

187 Intraperitoneal dissemination is a common feature among different subtypes of OC, including  
188 serous and non-serous subtypes.<sup>[6]</sup> We therefore wanted to evaluate whether multiple OC cell  
189 lines, representing a diverse variety of OC subtypes, can form similar outgrowths when  
190 cultured as suspended spheroids embedded in 2% MG. We examined OC cell lines Hey-A8  
191 and TYK-nu, representing non-serous and likely serous OC models, as defined by Domcke et  
192 al.<sup>[38]</sup> Similar to FNE-m-p53 spheroids, reconstitution of Hey-A8 **(MOVIE 2)** or TYK-nu  
193 **(MOVIE 3)** spheroids with 2% MG prompted outgrowth formation **(Figure 3E)**. The average  
194 percentage of outgrowth formation among Hey-A8 and TYK-nu spheroids varied from 50% to  
195 10%, respectively **(Figure 3E)**. Outgrowth formation in spheroids observed in different OC  
196 cell lines, but not normal FNE cells, suggests that ECM collaborates with transformation to  
197 support outgrowths.

#### 198 **Detached outgrowths clear mesothelial monolayers.**

199 OC outgrowths can ultimately detach from the transformed tissue, transit into the fluids of the  
200 abdominal cavity, and intercalate into mesothelial surfaces of other abdominal organs, such as  
201 the omentum.<sup>[1]</sup> To assess whether OC outgrowths, evoked by ECM reconstitution, possess the  
202 ability to intercalate into mesothelial cell layers, we utilized Hey-A8 spheroids embedded in  
203 2% MG due to their tendency to form long protruding outgrowths that are amenable to  
204 dissociation under a dissecting microscope. We mechanically separated Hey-A8 outgrowths  
205 from the spheroid structure and co-cultured both entities on top of a mesothelial cell monolayer  
206 expressing green fluorescent protein (GFP) **(Figure 4A)**. To examine the ability of spheroids



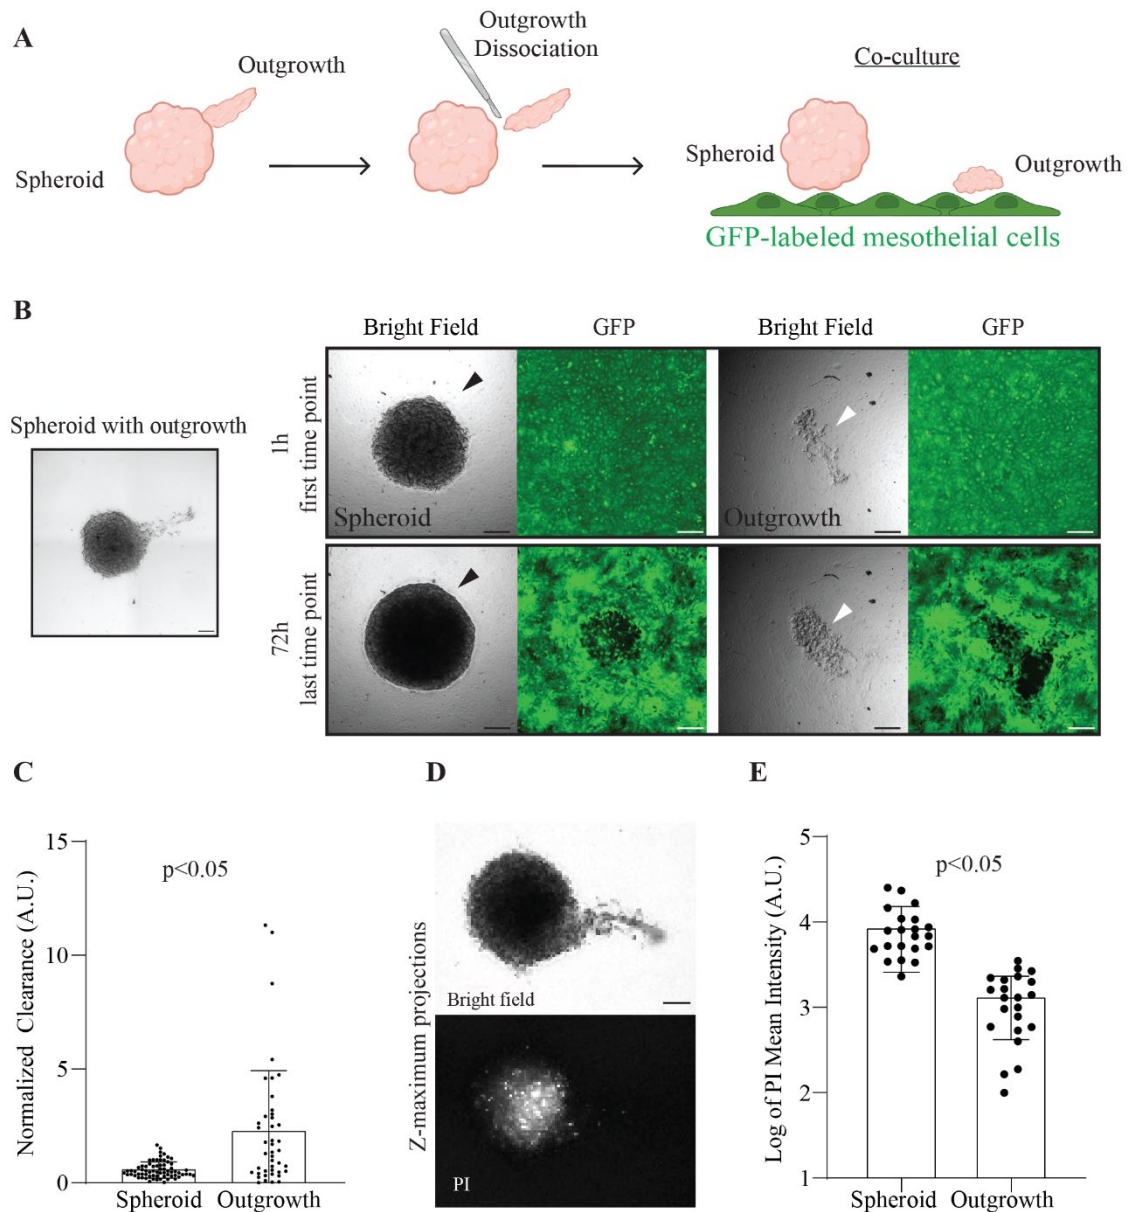

207 **Figure 4.** Detached outgrowths clear mesothelial monolayers. (A) Schematic representation of Hey-A8 outgrowth  
 208 detachment and co-culture with mesothelial cells expressing GFP. Created with BioRender.com. (B)  
 209 Representative bright-field image of a spheroid before outgrowth detachment, followed by representative bright-  
 210 field and fluorescent images of mesothelial clearance by Hey-A8 spheroid (black arrow) or detached outgrowth  
 211 (white arrows); scale bar is 200  $\mu\text{m}$ . (C) Quantification of mesothelial clearance by Hey-A8 spheroids and  
 212 detached outgrowths.<sup>[39]</sup> Each data point represents a spheroid or outgrowth from two independent experiments  
 213 from 69 spheroids and 43 outgrowths. (D) Representative bright-field and corresponding fluorescent maximum  
 214 projection images of a Hey-A8 spheroid forming an outgrowth and treated with propidium iodide (PI) to spatially  
 215 visualize cell death within the structure; scale bar is 200  $\mu\text{m}$ . (E) Quantification of PI incorporation by spheroids  
 216 or outgrowths. Twenty-one Hey-A8 cell structures were analyzed. In C and E all data points are shown with bars  
 217 indicating mean  $\pm$  SD, and an unpaired, two-tailed, non-parametric, Mann-Whitney test was used to examine  
 218 statistical differences between data sets.

219 and their corresponding outgrowths to invade mesothelial cell layers, we used a well-  
220 established mesothelial clearance assay,<sup>[40]</sup> which relies on measuring the area where initially  
221 adherent mesothelial cells are displaced by the introduction of OC spheroids.<sup>[39]</sup>

222 The formation of the cleared area is visualized by the time-dependent exclusion of GFP  
223 fluorescence, which is representative of mesothelial cell displacement from beneath the  
224 intercalating OC spheroid. Using this displacement assay, we were able to observe that  
225 detached outgrowths induced more mesothelial cell clearance compared to their corresponding  
226 OC spheroid clusters (**Figure 4B-C**). This observation could be due to spatial variation in  
227 viability between OC cells located within the outgrowth and cells within the spheroid. Spatial  
228 examination of cell viability using propidium iodide (PI), a fluorescent dye permeable only to  
229 dead cells, revealed a greater quantity of dead cells localized to the core of the OC spheroids  
230 relative to the outgrowths, which demonstrated minimal PI incorporation and thus increased  
231 cell viability (**Figure 4D-E**). These observations are consistent with the hypothesis that OC  
232 cell assemblies capable of forming outgrowths are viable and can efficiently intercalate into  
233 mesothelial cell layers upon detachment.

#### 234 **Increased ECM inhibits formation of outgrowths.**

235 As we have so far observed that ECM reconstitution of OC spheroids was able to induce  
236 formation of cell outgrowths that were able to intercalate into mesothelial cell layers, we  
237 wanted to further investigate the role of ECM in the regulation of OC cell outgrowths.  
238 Motivated by our initial observation indicating that OC prefers to grow away from collagen  
239 dense areas (**Figure 1**), we examined whether manipulation of ECM concentrations affect  
240 outgrowth formation. We compared the outgrowth formation capability of FNE-m-p53 and  
241 Hey-A8 spheroids reconstituted with 2% or 25% MG. As expected, reconstitution of both cell  
242 types with 2% MG induced outgrowth formations. In contrast, 25% MG culturing conditions  
243 significantly attenuated the development of outgrowths (**Figure 5A-B**), indicating that  
244 increasing ECM concentrations can suppress outgrowths. In addition, we observed that under  
245 25% MG conditions, both FNE-m-p53 and Hey-A8 spheroids appeared to be significantly  
246 smaller when compared to 2% MG reconstitution conditions (**S. Figure 1A-B**). In comparison  
247 to FNE-m-p53 spheroids, Hey-A8 spheroids cultured in 25% MG also appeared to be less  
248 compacted, coarse, and more disorganized (**Figure 5B, inset**). This may suggest that elevating  
249 ECM concentrations can have divergent effects on different OC cell lines. In the case of Hey-  
250 A8 spheroids, increased concentrations of ECM may have disrupted cell-cell adhesions, as

251 suggested by the decrease in N-cadherin staining at the edge of the spheroids (**S. Figure 2**).  
252 Decrease in spheroid size due to an increase in ECM concentrations indicated the possibility  
253 that increasing ECM deposition could affect cell proliferation.

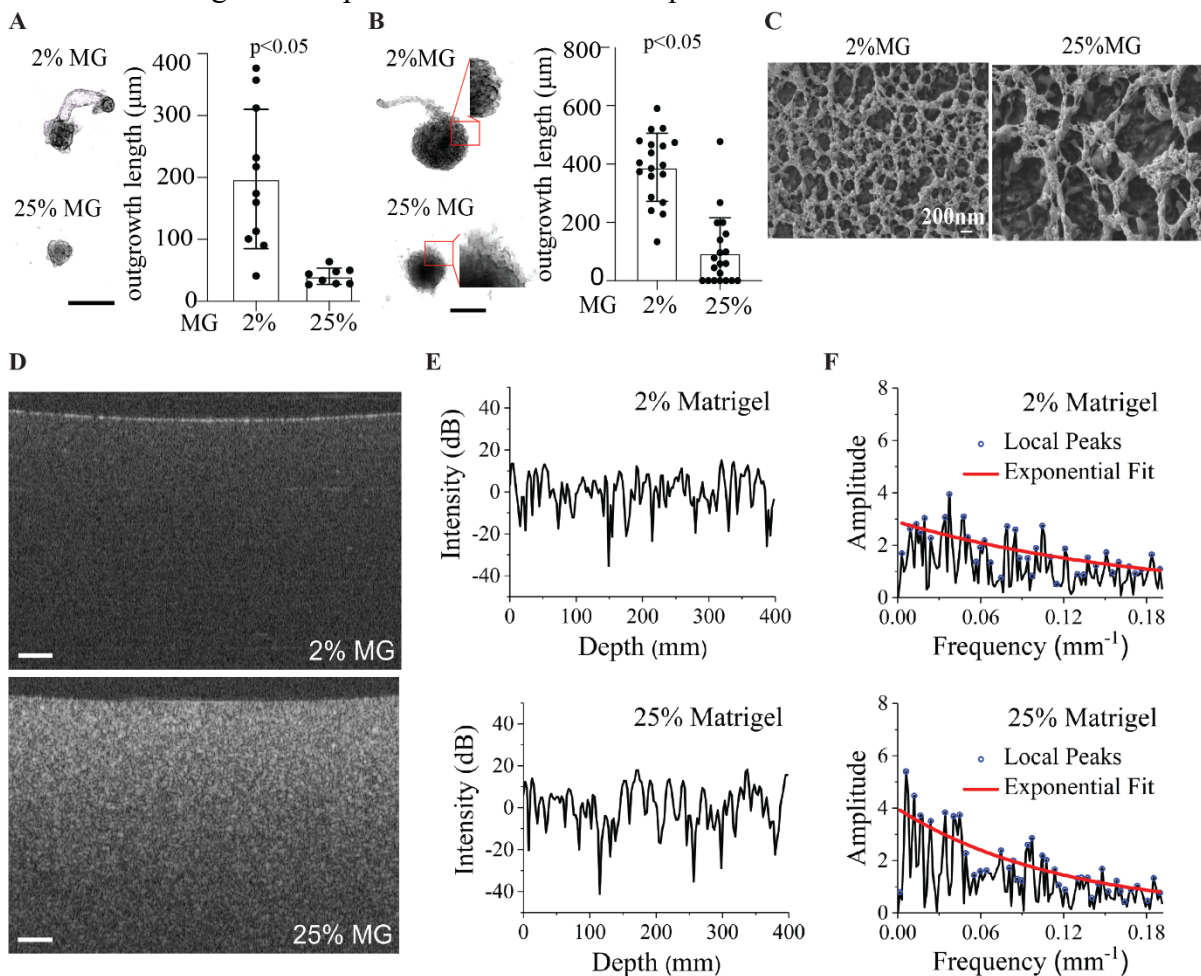

254 **Figure 5.** Elevation of ECM concentration inhibits outgrowths. Representative bright-field maximum Z-  
255 projection images of (A) FNE-m-p53 spheroids reconstituted with 2% or 25% MG; scale bar is 250  $\mu\text{m}$ . (B) Hey-  
256 A8 spheroids reconstituted with 2% or 25% MG; scale bar is 500  $\mu\text{m}$ . Spheroids were grown for 10 days, and the  
257 images show the final time point. Dot plots represent the distribution of outgrowth lengths from individual  
258 spheroids reconstituted with 2% or 25% MG. All data are shown with bars indicating mean  $\pm$  SD. An unpaired,  
259 two-tailed, parametric student t-test with Welch's correction was used to examine statistical differences between  
260 data sets. (C) Representative electron scanning micrographs representing 2% and 25% MG. (D) Representative  
261 OCT B-scan images of 2% and 25% MG; scale bars are 100  $\mu\text{m}$ . (E) Representative OCT depth-resolved intensity  
262 profiles where the slopes from optical attenuation are removed. (F) Amplitude spectra of the spatial frequency  
263 corresponding to the panel -E- show relatively stronger low-frequency components from 25% MG, and  
264 exponential fit of local peaks indicating a faster decay rate in 25% MG.

265 To explore this possibility, we took advantage of a 2D cell culture assay in which the cell  
266 monolayer is overlaid with MG,<sup>[41]</sup> thereby partially mimicking conditions of ECM  
267 encapsulation (**S. Figure 3A**). We integrated this assay with live-cell imaging of FNE-m-p53

268 and Hey-A8 cells stably expressing GFP or monomeric Kusabira-Orange2 (mKO2),  
269 respectively. FNE-m-p53-GFP or Hey-A8-mKO2 cells cultured with 25% MG significantly  
270 decreased cell proliferation (**S. Figure 3B-C, MOVIE 4 and 5**). These results were  
271 additionally supported by data indicating that 25% MG reconstitution of Hey-A8 spheroids  
272 significantly reduced the number of cells undergoing active DNA replication, as assessed by  
273 the 5-ethynyl-2'-deoxyuridine (EdU) incorporation assay (**S. Figure 3D**). We selected Hey-A8  
274 spheroids to examine EdU incorporation due to the formation of significantly larger spheroid  
275 structures when compared to FNE-m-p53 cells (**S. Figure 1A-B**), enabling robust EdU  
276 incorporation analysis. Taken together, these results suggest that ECM play a significant role  
277 in the OC cell environment and can modulate OC cell proliferation and outgrowth formation.

### 278 **Increased ECM leads to the formation of thick fibrillar networks.**

279 The phenotypic influence of ECM concentrations on outgrowth formation and cell proliferation  
280 (**Figure 5A-B, and S. Figure 3**), combined with the previous IHC examination of tumors,  
281 which indicate that OC tumors can form protruding outgrowths away from thick collagen  
282 fibrous network associated with tumor-surrounding tissue (**Figure 1**), motivated us to examine  
283 whether higher ECM concentrations exhibit differences in fibrous network thickness. Scanning  
284 electron microscopy (SEM) of MG revealed qualitative differences between ECM networks  
285 formed in 2% and 25% MG (**Figure 5C**); network fibers formed in 25% MG appeared to be  
286 thicker and more spaced out (larger spaces between fibers) as compared to network fibers  
287 formed in 2% MG. For quantitative evaluation of ECM fibers, we imaged the MG samples  
288 using optical coherence tomography (OCT), where the endogenous optical contrast describes  
289 the microstructure of the sample. The OCT B-scan images revealed a higher contrast from the  
290 ECM contents with larger high-intensity clusters in the 25% MG condition compared with the  
291 2% MG condition (**Figure 5D**). Also, the representative OCT depth-resolved intensity profiles  
292 where the slopes from optical attenuation are removed, show a larger spatial period of intensity  
293 fluctuations in the 25% MG (**Figure 5E**), which can be clearly seen with relatively more low-  
294 frequency components from the corresponding amplitude spectra (**Figure 5F**). This feature in  
295 the spatial frequency was quantified with the decay coefficient from an exponential fit of the  
296 local peaks in the amplitude spectra (**Figure 5F**), where a higher exponential decay coefficient  
297 in 25% MG indicates relatively stronger low-frequency components, suggesting thicker ECM  
298 fibers and/or larger space between ECM fibers in 25% MG.

299

### 300 **ECM modulates viscoelasticity of OC culture microenvironments.**

301 Based on data demonstrating formation of thicker, spatially distributed – ECM fiber networks  
302 in 25% MG cultures, and previous reports indicating positive correlation between MG  
303 concentration and elasticity,<sup>[42]</sup> we wondered whether increasing the concentration of ECM in  
304 our model would affect the cell culture's viscoelasticity e.g., changes to time dependent  
305 elasticity and the viscous behavior of MG in the cell culture.<sup>[43]</sup> We characterized the linear  
306 viscoelastic material functions of cell culture media containing 2% or 25% MG. This analysis  
307 revealed that in culture media supplemented with 25% MG, the loss modulus ( $G''$ ) values  
308 representing viscous behavior, which are indicative of the energy dissipated as heat when the  
309 culture media is deformed under small-amplitude oscillatory shearing, were within a narrow  
310 range of 0.5 to 0.9 Pa in the frequency range of 0.1 to 10  $s^{-1}$ . The loss modulus values were  
311 thus not sensitive to the frequency of rotation (**Figure 6A**). Under similar conditions, the  
312 storage modulus ( $G'$ ) values representing elasticity i.e., indicative of the energy stored as  
313 elastic energy during the deformation of the culture media, were within the range of 3.5 to 4.5  
314 Pa. The storage modulus ( $G'$ ) values were also insensitive to the frequency of rotation (**Figure**  
315 **6A**).

316 The loss modulus ( $G''$ ) values of samples cultured in 2% MG ranged between 0.05 to 0.1 Pa  
317 while the storage modulus ( $G'$ ) values were between 0.09 to 0.3 Pa (Figure 6C). The storage  
318 moduli of 25% MG reconstituted culture media were significantly higher than the loss moduli  
319 ( $G' > G''$ ), and the ratio of  $G''/G'$  ( $\tan \delta$ ) was below 1 (Figure 6B). On the other hand, the 2%  
320 MG reconstitution condition produced  $\tan \delta$  values greater than 1 (Figure 6D), indicating a less  
321 elastic nature of the 2% versus the 25% MG. As expected, these results suggest that the  
322 elasticity of media containing 25% MG is significantly higher than that containing 2% MG.  
323 Measurements of loss and storage moduli of ascites isolated from three different OC patients  
324 exhibited a closer similarity to the values of  $G''$ ,  $G'$  and  $\tan \delta$  observed in the 2% MG  
325 reconstitution condition (Figure 6E-F and S. Figure 4B-C), indicating that ascites may  
326 mechanically appear as gels with lower elasticity. Although the study of ascitic viscoelasticity  
327 was limited to 3 patient samples that showed considerable  $G'$  and  $G''$  variation (S. Figure 4B-  
328 C), all the samples exhibited a relatively low storage modulus when compared to 25% MG.  
329 Behavior of ascites as weak gels with low torque values could also account for the variability,  
330 because data points associated with very low rotation frequencies might be close to the limits

331 the instrument's sensitivity. Nevertheless, the similarity of viscoelastic properties between 2%  
 332 MG and patient-derived ascites motivated us to evaluate whether ascites possess the ability to

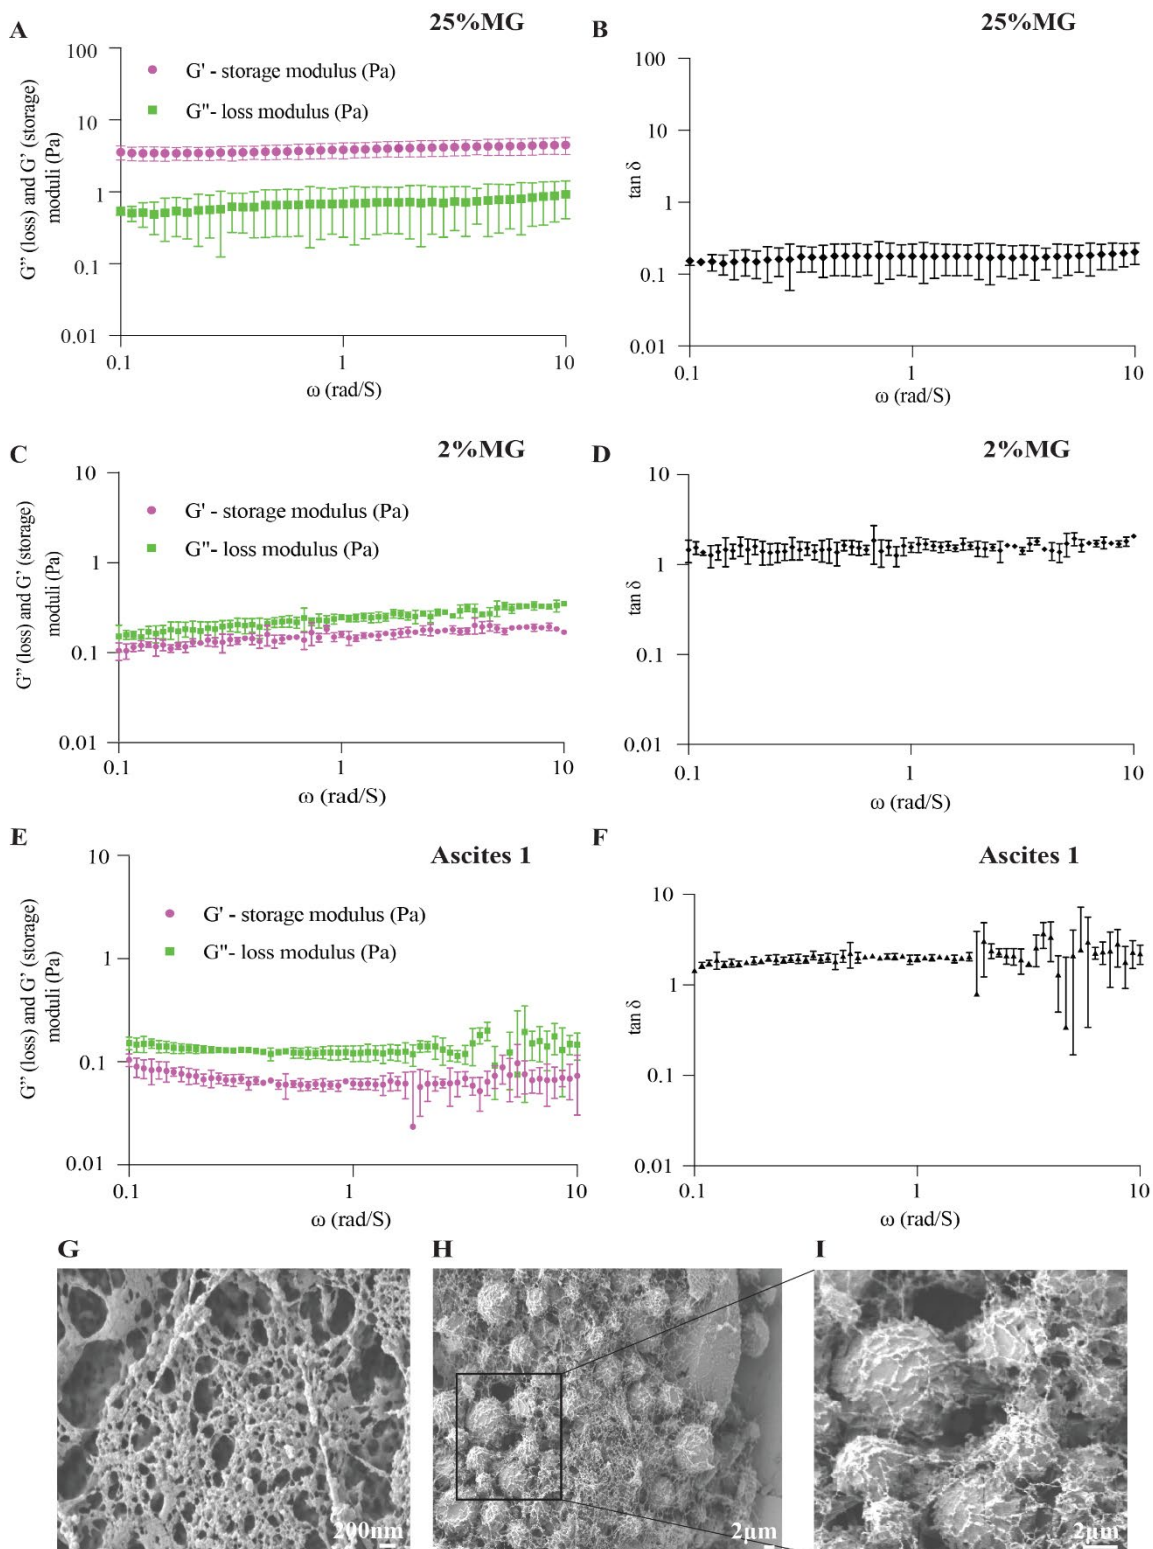

333 **Figure 6.** ECM modulates viscoelastic properties in the OC culture microenvironment. Measurements of storage  
 334 (elastic) and loss (viscous) moduli in OC cell culture media reconstituted with 2% or 25% of MG (**A**, **C**); or in  
 335 ascites isolated from OC patients with a relapsed disease (**E**). (**B**, **D**, **F**) Graphs represent calculated  $\tan \delta$  from  
 336 values reported in A, C & E. (**G**, **H**, **I**) Scanning electron micrographs represent the ascitic fibrous network

337 surrounding tumor cells. Each data point represents the mean and SD from triplicate measurements with a total of  
338 41 (25% MG), 91 (2% MG) & 91 (ascites) measurements.

339 form extracellular fibrous networks. Scanning electron microscopy of ascitic fluid indicated  
340 the presence of structures resembling extracellular fiber networks (Figure 6G). Additionally,  
341 fibrous structures were associated with cells that were isolated along with ascites. Moreover,  
342 we have detected, using IHC, laminin and collagen fiber-like structures that were associated  
343 with detached OC clusters isolated from human or mouse ascites (**S. Figure 5**). Taken together,  
344 these results are consistent with the hypothesis that ECM microenvironments with low shear  
345 viscosity and elasticity, support OC outgrowth formation.

### 346 **Increased ECM suppresses directional translocation.**

347 Based on observations that outgrowths are initiated by cell assemblies that translocate outside  
348 the main spheroid structure (**Figure 3, MOVIE 1, 2, and 3**), and that increasing ECM  
349 concentration suppresses the formation of outgrowths, decreases spheroid size, and impedes  
350 cell proliferation (**Figure 5A-B, and S. Figures 1 and 3**), we hypothesized that high ECM  
351 concentrations also suppress cell translocation.

352 To track the movement of cells embedded in ECM, we overlaid FNE-m-p53-GFP and Hey-  
353 A8-mKO2 cells grown on a 2D surface with media containing 2% or 25% MG (**S. Figure 3A**).  
354 We analyzed the cell translocation dynamics of FNE-m-p53-GFP and Hey-A8-mKO2 cells  
355 overlaid with differing MG concentrations using an ImageJ-integrated plugin, TrackMate and  
356 measured the confinement ratio output, which represents the efficiency of cell translocation  
357 away from its original starting point (**Figure 7A**; see Materials and Methods for details). We  
358 observed that overlaying FNE-m-p53-GFP or Hey-A8-mKO2 cells with 2% MG resulted in a  
359 confinement ratio that was significantly larger than the confinement ratio of cells overlaid with  
360 25% MG, indicating more efficient cell translocation (**Figure 7B-E**). Cell tracks appeared more  
361 persistent and directional in cells overlaid with 2% MG medium as compared to 25% MG  
362 medium (**Figure 7B, D, and MOVIE 6 and 7**), suggesting that an increase in ECM deposition  
363 can suppress directional cell translocation and is competent in anchoring cells to their starting  
364 point, as supported by the increased number of focal adhesions under 25%MG conditions (**S.**  
365 **Figure 6 and S. Figure 7**). Furthermore, we observed that OC cells superficially attached to  
366 the outer surface of murine small intestine did not invade beyond smooth muscle actin positive

367 stroma (**S. Figure 8**), supporting that some OC tumors can grow superficially and do not  
 368 penetrate beyond stroma and dense ECM.

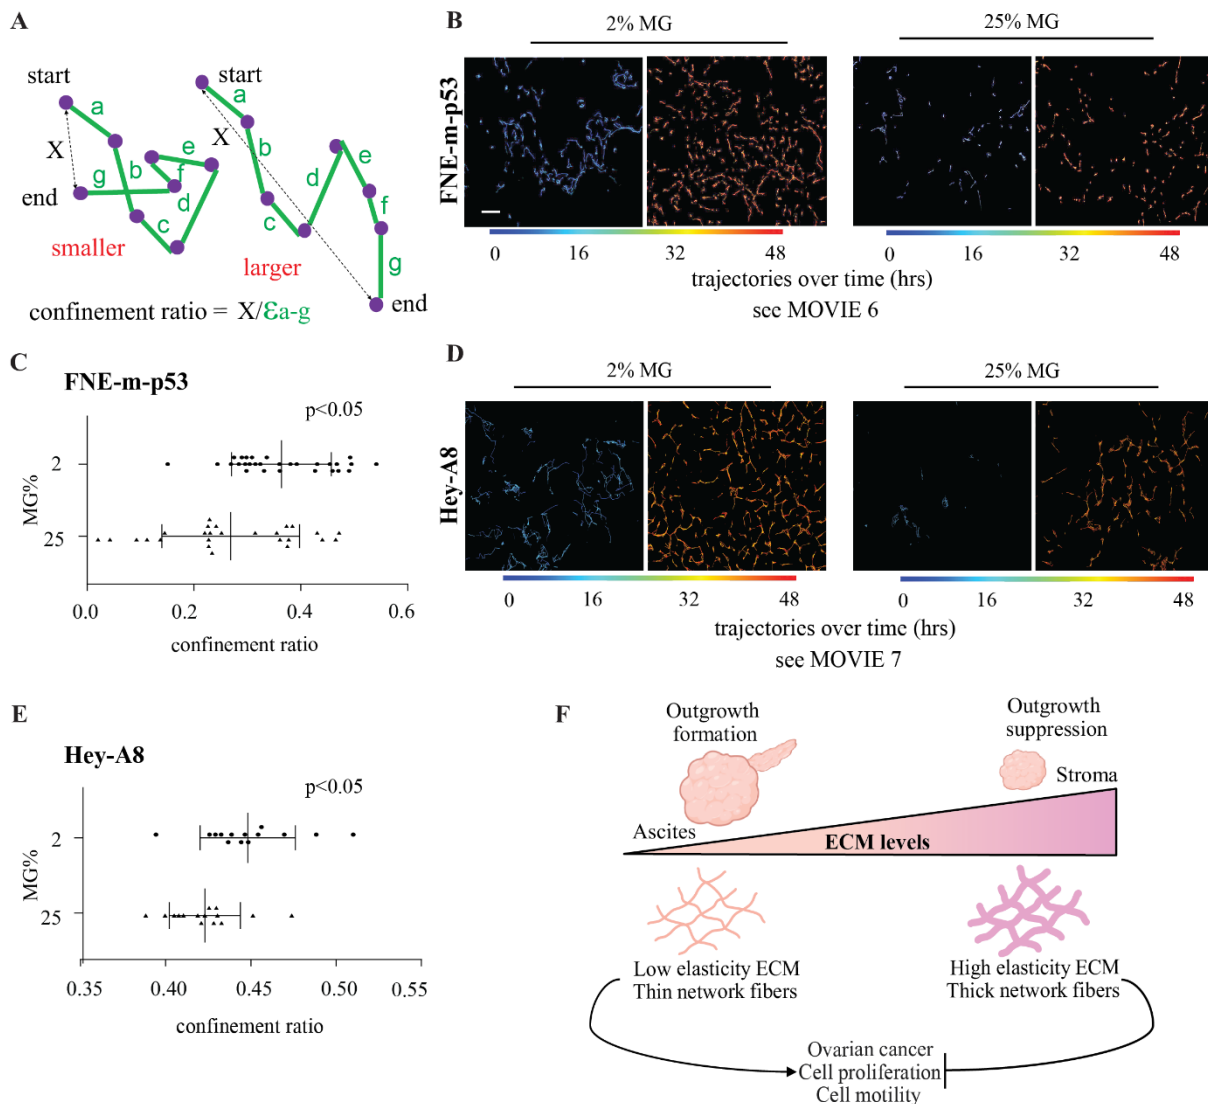

369 **Figure 7.** Elevation of ECM concentration suppresses directional cell translocation. **(A)** Graphical illustration of  
 370 confinement ratio quantification. **(B)** Representative trajectory images of cell translocation within FNE-m-p53 or  
 371 **(D)** Hey-A8 cell monolayers overlaid with 2% or 25% MG. Each line represents a single cell trajectory formed  
 372 during 50 frames/time interval. Time zero corresponds to the first 50 frames; scale bar 100  $\mu$ m. Distribution of  
 373 confinement ratio within **(C)** FNE-m-p53 or **(E)** Hey-A8 cell monolayers overlaid with various concentrations  
 374 of MG. Each dot represents one field of view that contained 20-100 cells/ condition (2% vs. 25% MG). All data  
 375 points are shown with bars indicating mean  $\pm$  SD. Two independent experiments were performed with a total of  
 376 12-30 fields of view. An unpaired, two-tailed, parametric student t-test with Welch's correction was used to  
 377 examine statistical differences between data sets. **(F)** Graphical representation of key findings in this study.  
 378 Created with BioRender.com

379



## 380 DISCUSSION

381 The mechanism of OC dissemination is still poorly understood; it involves the localized  
382 spreading of OC cell clusters that grow outward and detach from the primary tumor and  
383 disseminate within the peritoneal cavity. To investigate the conditions that prompt the  
384 formation of these OC outgrowths, we employed immunohistochemical stains to evaluate  
385 tissue samples representing human and PDX models of OC tumors. Immune and histochemical  
386 examination of laminin  $\gamma$ 1 and collagens revealed that OC outgrowths were identifiable with a  
387 distinct ECM microenvironment. The ECM microenvironment observed among carcinoma  
388 cells contained abundant laminin  $\gamma$ 1 along with lower levels of collagens expression. In  
389 contrast, the underlying extra-tumoral stroma exhibited lower laminin  $\gamma$ 1 levels but contained  
390 dense collagen fibers. We also observed that OC outgrowths were primarily clustered away  
391 from the underlying extra-tumoral stroma, towards what we presumed was a less constrictive  
392 microenvironment. These results prompted us to use laminin- and collagen-reconstituted 3D  
393 tissue culture approaches to discern the conditions promoting the formation of OC outgrowths.

394 Laminin- and collagen-rich MG<sup>[37]</sup> reconstitution of 2D and 3D OC cell cultures was used in  
395 combination with live-cell imaging, SEM, OCT, and rheology to examine the contribution of  
396 ECM to OC outgrowth dynamics. Live-cell imaging demonstrated that ECM reconstitution of  
397 OC spheroids, representing various OC subtypes, promoted the formation of outgrowths that,  
398 upon detachment, exhibited the ability to intercalate into mesothelial cell layers. We observed  
399 outgrowth formation in various genetically distinct OC cell lines including FNE-m-p53. ECM  
400 reconstitution did not promote the formation of outgrowths in normal, non-transformed FNE  
401 cultures, indicating that outgrowth formation is associated with transformed phenotypes of the  
402 cells of origin. OC outgrowths were observed to be initiated by cell assemblies that undergo  
403 outward translocation<sup>[1]</sup> from the main spheroid. Increasing ECM concentrations led to  
404 increased elasticity of OC cell culture media, suppressed proliferation, decreased directional  
405 cell translocation, and suppressed outgrowths. Based on these results we propose a model in  
406 which OC cells favor a low elasticity ECM microenvironment to divide, translocate and form  
407 outgrowths with the potential to extend into the peritoneal cavity (**Figure 7F**). Our findings  
408 could provide reasoning for why some genetically distinct OC subtypes are superficially  
409 invasive and prefer to grow away from the ECM-dense stroma and tend to form outgrowth  
410 protrusions extending into a more fluid environment such as peritoneal ascites.

411 Recent IHC evaluation of OC within the fallopian tube revealed enrichment of laminin  $\gamma 1$   
412 chain,<sup>[22]</sup> a component of the heterotrimeric laminin  $\alpha\beta\gamma$  molecule.<sup>[44]</sup> Consistent with this  
413 study, we found that tumor cells representing OC outgrowths protruding from the ovary and  
414 omental metastases were enriched in laminin  $\gamma 1$ . In contrast to tumor cells, the adjacent stroma  
415 displayed low levels of laminin  $\gamma 1$  deposition, highlighting an involvement of  $\gamma 1$ -chain  
416 containing laminins in the regulation of cell-cell and cell-ECM<sup>[2]</sup> adhesion among tumor cell  
417 assemblies competent in forming outgrowths. Laminins promote the formation of the basement  
418 membranes that support epithelial cell proliferation and collective cell migration during tissue  
419 development.<sup>[45,46]</sup> We speculate that formation of a sufficient number of cell-ECM adhesions  
420 among OC cells could contribute to tumor expansion and cell translocation, leading to the  
421 initiation of the observed outgrowths. In concurrence, our ECM-reconstituted OC spheroid  
422 model demonstrated that low concentrations of ECM were conducive in the promotion of  
423 cellular proliferation, directional cell translocation and outgrowth formation, while increased  
424 ECM concentrations were instead suppressive of the listed phenotypes. We speculate that the  
425 latter phenomenon may be attributed to increasing cell-ECM adhesion beyond the optimal  
426 point required for the processes.

427 Combination of SEM and OCT imaging revealed that elevation of ECM concentration, in  
428 culture, led to the formation of more thick and spaced-out protein fibers. These structural  
429 changes in ECM networks were associated with suppression of OC cell proliferation and  
430 directional translocation. These results are consistent with previous studies demonstrating  
431 collagen-fiber localization beneath OC outgrowths originating from the fallopian tube<sup>[23]</sup> and  
432 within the stroma surrounding metastatic omental implants.<sup>[47]</sup> Collagen fiber formation occurs  
433 when collagen concentration increases,<sup>[48]</sup> indicating that extra-tumoral fibrils reflect the  
434 presence of highly elastic ECM. In addition to negative regulation of cell motion by elevation  
435 of collagen fiber content and fiber alignment,<sup>[49]</sup> increasing diameter of collagen fibers<sup>[50]</sup> and  
436 spacing between collagen networks<sup>[51]</sup> has been shown to suppress cell motility. These data  
437 suggest that not only ECM concentration<sup>[51]</sup> but also architecture of ECM is important in the  
438 regulation of cell motion.

439 Metastatic OC tumor cells superficially invade the mesothelial cell layer of the peritoneal  
440 membrane,<sup>[6]</sup> and we have consistently observed that OC tumors growing within mouse  
441 peritoneum colonized surfaces of the omentum or small intestine and formed superficial  
442 outgrowths extending into the peritoneal cavity, with minimal invasion of the underlying

443 stroma. Combined with our observations of outgrowth formation under low- but not high- ECM  
444 conditions, we suggest that the dynamic evolution of OC outgrowths is supported by low ECM  
445 concentration microenvironments (**Figure 3**). OC cell proliferation, translocation, and  
446 outgrowth formation were more robust under 2% MG culture conditions, indicating a  
447 possibility that elevated levels of ECM surrounding OC spheroids could provide a physical  
448 barrier that suppresses the formation of outgrowths and concomitantly hinders dissemination  
449 of OC tumor cells into the peritoneal cavity.

450 Recent studies have demonstrated that increasing the concentration of collagen managed to  
451 restrict single-cell translocation from cell clusters, as measured by the mean square  
452 displacement of the tracked trajectories.<sup>[52]</sup> Additionally, targeting fibroblasts that produce  
453 collagens resulted in reduced collagen deposition and increased OC cluster dispersal.<sup>[47]</sup>  
454 Furthermore, 2D studies of the effects of ECM concentration on cell motility have pointed to  
455 the existence of optimal ECM concentrations that support efficient directional cell  
456 migration.<sup>[53]</sup> Concentrations below or above optimal levels did not stimulate fibroblast  
457 migration to the same extent.<sup>[53]</sup> In agreement, our study supports this correlation by  
458 demonstrating that OC cells reconstituted with a higher concentration of ECM show a reduction  
459 in both directional cell translocation and outgrowth formation. This could be potentially  
460 explained by optimal integrin-complex turnover rates under appropriate ECM concentrations.  
461 Previously, it has been shown that high concentrations of ECM can lead to strong adhesion,<sup>[53]</sup>  
462 as well as low adhesion turnover.<sup>[54]</sup> Therefore, we speculate that an OC microenvironment  
463 with low ECM concentration supports the formation of adhesion complexes that are more  
464 dynamic and, thus, capable of promoting directional cell translocation. In contrast, the strong  
465 attachment of OC cells for instance due to presence of thick ECM fibers would lead to static  
466 adhesion that could impede directional cell translocation. This speculation is supported by the  
467 observation that embedding cell monolayers in high ECM increased the number of paxillin-  
468 rich focal adhesions (**S. Figure 6 and 7**).

469 Varying ECM concentrations were observed to modulate viscoelastic characteristics of the  
470 microenvironment and could possibly affect cell behavior,<sup>[55]</sup> including the acquisition of  
471 transformed phenotypes in normal cells.<sup>[56]</sup> Using rheometric analysis of our ECM-  
472 reconstituted culture media, we demonstrated that the addition of 2% MG resulted in lower  
473 elasticity as compared to the addition of 25% MG, which led to the development of thick  
474 fibrous networks and the highly elastic properties of the ECM reconstituted culture media,

475 which is characteristic of a more solid environment (**Figure 6**). Our data demonstrated that  
476 ECM concentrations corresponding to lower elastic properties were conducive to cell  
477 proliferation, directional cell translocation, and formation of outgrowths. Thus, it may be  
478 conceivable to propose that ECM deposited on the surface of primary OC tumor cells creates  
479 a low-elasticity ECM microenvironment that provides optimal adhesion and traction force to  
480 support cell proliferation and motility of OC tumor cells. In contrast, increasing the deposition  
481 of ECM within the OC tumor microenvironment would increase adhesion and suppress cell  
482 proliferation, cell translocation, and outgrowth formation (**Figure 7F**). Our model is consistent  
483 with clinical observations that OC peritoneal dissemination is associated with tumor  
484 outgrowths that protrude from the tumor into the peritoneal cavity<sup>[4,22]</sup> through ascites<sup>[7,57]</sup>,  
485 which likely represent a low-elasticity microenvironment;<sup>[7,55]</sup> this is supported by  
486 measurements of shear moduli values of ascites, resembling those of 2% MG cultures, as well  
487 as SEM and IHC images showing fibrous networks overlaying OC cells (**S. Figure 5 and**  
488 **Figure 6E-I**).

489 OC outgrowths continue to evolve after chemotherapy because detached OC cell clusters are  
490 present within the ascitic fluid and peritoneal cavity of patients with recurrent disease.<sup>[7]</sup> OC  
491 cells that have recovered from chemotherapy may be in direct contact with ECM deposited  
492 within tumors and extra-tumoral space (**Figure 2B-E**). Thus, the ECM-reconstitution model of  
493 OC outgrowths offers a clinically relevant approach to examining the dynamic processes of  
494 disease progression and recurrence. Together with the implementation of live-cell imaging,  
495 SEM, OCT, and rheology, this model can provide important insights into the role of physical  
496 characteristics of certain ECM components of OC microenvironments and their contribution to  
497 OC outgrowth formation. The presented model of OC outgrowths is limited because it does not  
498 recapitulate the full spectrum of ECM molecules associated with OC microenvironment.<sup>[58]</sup>  
499 Future studies that quantitatively assess the ECM protein content *in vivo* would be necessary  
500 to guide reconstruction of ECM microenvironment for further examination of ECM  
501 contribution to OC growth.

## 502 **METHODS**

### 503 **Cell Culture**

504 Hey-A8 (obtained from Dr. Sumegha Mitra's laboratory, University of Indiana) and Tyk-nu  
505 (obtained from Dr. Joan Brugge's laboratory, Harvard Medical School) cells were cultured in  
506 a 1:1 ratio of Gibco™ Medium 199 (Gibco™) and MCDB105 (Sigma-Aldrich®) supplemented

507 with 5% heat-inactivated fetal bovine serum (HI-FBS; Gibco™), 1% (v/v) Penicillin-  
508 Streptomycin (Gibco™) and 50 µg/ml plasmocin prophylactic (InvivoGen®). FNE cells  
509 (obtained from Dr. Tan Ince's laboratory, Weill Cornell Medicine, New York) were cultured  
510 in a 1:1 ratio of Medium 199 (HiMedia®) and DMEM/F12 (HiMedia®), 3% HI-FBS  
511 (Corning®), 1% (v/v) Penicillin-Streptomycin (Sigma-Aldrich®), 0.5 ng/ml of 17 beta-estradiol  
512 (US Biological®), 0.2 pg/ml of triiodothyronine (Sigma-Aldrich®), 0.025 µg/ml all-trans  
513 retinoic acid (Beantown Chemical®), 20 µg/ml of insulin (Sigma-Aldrich®), 0.5 ng/ml of EGF  
514 (PeproTech®), 0.5 µg/ml hydrocortisone (Sigma-Aldrich®), 25 ng/ml of Cholera Toxin  
515 (Calbiochem) and 50µg/ml plasmocin prophylactic (InvivoGen®). ZT lung mesothelial cells  
516 (obtained from Dr. Tan Ince's laboratory, Weill Cornell Medicine, New York) were from a  
517 benign pleural effusion. These cells were immortalized by ectopic expression of the SV40 T  
518 antigen and overexpression of human telomerase, which was fused to GFP.<sup>[59]</sup> Cell cultures  
519 were tested for the presence of mycoplasma every 3 months using the Uphoff and Drexler  
520 detection method.<sup>[60]</sup>

## 521 IHC

522 Formalin-fixed, paraffin-embedded (FFPE) patient-derived xenograft tissues (PDX) were a  
523 kind gift from Dr. Ronny Drapkin, University of Pennsylvania. Sections were deparaffinized  
524 in two xylene changes for 10 minutes each, then hydrated in a graded series of ethanol (100%  
525 (v/v), 90% (v/v), 70% (v/v), 50% (v/v)) for 5 minutes each, and finally washed in ultrapure  
526 water for 5 minutes. The ABC kit, Vectastain Elite (Vector Laboratories) was used, per the  
527 manufacturer's recommendation. The primary antibodies used were anti-PAX8 (1:1000;  
528 #10336-1-AP; Protein tech.), anti-LAMC1 (1:500; #HPA 001909; Sigma Aldrich). A  
529 peroxidase substrate (ImmPACT DAB; #SK-4105; Vector Laboratories) was used to develop  
530 and visualize staining under the microscope (Nikon ECLIPSE Ci-L equipped with a Nikon DS-  
531 Fi3 camera). The slides were rinsed in water and dehydrated in a series of ethanol solutions of  
532 increasing concentrations until 100% (v/v) ethanol was reached. The slides were then cleared  
533 in xylene, mounted with a non-aqueous mounting medium (#H-5000; Vector Laboratories),  
534 sealed using clear nail polish, and left to dry before imaging. Collagen staining was performed  
535 using a Picrosirius red staining kit (#24901; Polysciences, Inc.) per the manufacturer's  
536 recommendation. Deparaffinization and hydration were followed by 1-hour staining in  
537 Picrosirius Red, washing in hydrochloric acid, dehydration, clearing in xylene, and mounting  
538 as described above.

### 539 **IHC Image Acquisition**

540 Stained slides were scanned using an Olympus IX83 microscope equipped with a DP80 color  
541 camera and CellSens software. Based on scanned slides, ROIs were identified and recaptured  
542 using a Nikon Eclipse equipped with a DS-Fi3 color camera and NIS Elements D software.  
543 Images were saved in tag-image file format TIFF for further processing.

### 544 **IHC Image Processing**

545 As previously described,<sup>[61]</sup> RGB images were converted, using a weighted RGB conversion  
546 option in FIJI (Fiji is just ImageJ) software,<sup>[62]</sup> to an 8-bit grayscale range representing values  
547 between black (0) and white (255). To clean out the white noise from the background, images  
548 were inverted and multiple ROIs representing tumor, stroma, or areas without tissue were  
549 selected. Mean gray values (between 0-255) were calculated for each ROI and subsequently  
550 plotted after subtracting the background signal of area without tissue. Statistical analysis was  
551 performed using the Ordinary One-way ANOVA function of GraphPad Prism [version 9.1.0  
552 for Windows, GraphPad Software, San Diego, California USA, [www.graphpad.com](http://www.graphpad.com)].

### 553 **Pathology Scoring of Laminin $\gamma$ 1 Expression in Human Tumors**

554 Intensity profiles of IHC were qualitatively scored as strong (+3), moderate (+2), weak (+1),  
555 and negative (0). IHC results were recorded by a pathologist using H-scores, which were  
556 calculated by the following formula:  $H\text{-score} = [(0 \times \% \text{negative cells}) + (1 \times \% \text{weakly positive}$   
557  $\text{cells}) + (2 \times \% \text{moderately positive cells}) + (3 \times \% \text{strongly positive cells})$ . Data are represented  
558 as dot plots of H-scores for matched biopsy. Since the data falls into a category of a non-normal  
559 distribution, a (nonparametric) Wilcoxon rank-sum test was used to calculate significant  
560 differences between pre- and post-therapy specimens.

### 561 **ECM Reconstitution**

562 One hundred cells per well were seeded on ultra-low attachment 96-well plates (Corning<sup>®</sup>),  
563 immediately centrifuged at 900 RPM for 3 minutes, and allowed to incubate until the following  
564 day. On the following day, on ice and using prechilled pipette tips, 100  $\mu$ L of 4% (v/v), or 50%  
565 (v/v) Matrigel<sup>®</sup> (MG) (Corning<sup>®</sup>) was added to each well containing 100  $\mu$ L of clustered  
566 spheroid, with a final culture volume of approximately 200  $\mu$ L and final MG concentration of  
567 approximately 2% (v/v) or 25% (v/v). Matrigel lot numbers; 9294001; 9028255; 1244002;  
568 1362001; 0288002 were used. These lot numbers represent catalogue number 354230.

569

570

## 571 **Live-Cell Imaging of 3D Cultures**

572 Ultra-low adhesion 96-well plates containing ECM reconstituted cell cultures were placed  
573 within an Agilent® BioTek® LionHeart™ FX long-term imaging chamber equipped with  
574 enclosed optics, temperature, and gas exchange controls. Individual spheroids were imaged for  
575 up to 7 days with images being captured at indicated time intervals. Multiple XYZ planes of  
576 spheroids were acquired simultaneously.

## 577 **Quantification of Outgrowth Protrusion Frequency**

578 To quantify the frequency of outgrowth protrusions by spheroids representing various FNE and  
579 OC cell lines, different laboratory members set up at least thirty spheroid cultures reconstituted  
580 with 2% (v/v) MG were prepared for each experiment. Outgrowths were subjectively defined  
581 as distinct cell populations that appeared outside of the main spheroid. Scoring was performed  
582 using a Nikon 2000 tissue culture microscope with a 10X objective.

## 583 **Mesothelial Clearance Assay**

584 Mesothelial cells were plated on glass-bottom dishes (Mat-TEK Corporation), which had been  
585 coated with 5 µg/mL of fibronectin (Sigma-Aldrich®). GFP-expressing ZT cells were  
586 maintained in culture to form a confluent monolayer (up to 24 hours after plating). Spheroids  
587 generated with Hey-A8 were cultured for a period of seven days. Using a dissecting microscope  
588 and surgical scalpel, outgrowths were mechanically detached from their main spheroid and  
589 subsequently transferred to the co-culture containing the mesothelial monolayers. In the co-  
590 culture experiments, spheroids and their respective outgrowths were allowed to interact with a  
591 confluent mesothelial monolayer expressing green fluorescent protein (GFP). Co-culture was  
592 imaged at 1-hour intervals for up to 72 hours using an Agilent® Biotek® LionHeart™ FX  
593 (BioTek) inverted Motorized Widefield Fluorescence Microscope. Mesothelial clearance was  
594 quantified as previously described.<sup>[39]</sup> The non-fluorescent area in the GFP images of the last  
595 time point of the assay, created by the penetrating cell cluster into the GFP mesothelial  
596 monolayer, was measured using FIJI <sup>[62]</sup> software. The non-fluorescent area of the final  
597 timepoint was then normalized to the area of the spheroid at the initial timepoint from the bright  
598 field channel acquisition. Data distribution and statistical analysis were conducted using  
599 GraphPad Prism [version 9.1.0 for Windows, GraphPad Software, San Diego, California USA,  
600 [www.graphpad.com](http://www.graphpad.com)].

601

## 602 **Cell Viability and PI Incorporation Assay**

603 The viability of both spheroid and outgrowth were quantified with a propidium iodide (PI)  
604 incorporation assay. PI is a red fluorescent dye that intercalates into double-stranded DNA but  
605 is only permeable through the compromised plasma membranes of dying/dead cells. Hey-A8  
606 spheroids were cultured in 2% (v/v) MG and allowed to incubate for a period of 7 days. Hey-  
607 A8 spheroids were stained with PI to a final concentration of 2  $\mu\text{g}/\text{mL}$ , then allowed to incubate  
608 for 30 minutes in dark. Hey-A8 spheroids were subsequently imaged with an Agilent®  
609 BioTek® LionHeart™ FX automated microscope. Z-projected images were captured with a  
610 4X objective in both bright field and PI (590  $\gamma$  excitation spectra – Texas red) channels.  
611 Following image acquisition, Z-projections for each spheroid were opened in FIJI<sup>[62]</sup> and  
612 subjected to the following: Z-projections were stacked, regions of interest (ROIs) for each  
613 bright field acquisition were manually selected for both the spheroid and its associated  
614 outgrowth and selected ROIs were then superimposed over the paired PI acquisition of the  
615 same spheroid. From each Texas red channel acquisition, the mean intensity of PI was  
616 measured for both ROIs (spheroid and outgrowth) and normalized to the area of the respective  
617 ROI, thereby yielding PI mean intensity for the area of the spheroid, and for the area of the  
618 outgrowth. PI mean intensity were plotted, and statistical analysis was conducted using  
619 GraphPad Prism [version 9.1.0 for Windows, GraphPad Software, San Diego, California USA,  
620 [www.graphpad.com](http://www.graphpad.com)].

## 621 **Determination of Outgrowth Length and Cellular Structure Area**

622 GEN5 image analysis software (BioTek) was used to quantify outgrowth length and ImageJ  
623 was employed to analyze spheroid size. Before quantification, a series of bright field images,  
624 representing multiple XYZ planes of a discrete cellular structure, was collapsed to generate  
625 maximal projections of a spheroid and its protruding outgrowth. Outgrowth protrusion was  
626 identified as a structure that extended beyond the main spheroid body, and a line was drawn  
627 from the tip across the longer axis of the outgrowth, terminating at the junction between  
628 outgrowth protrusion and the spheroid. The size of the cellular structure was calculated using  
629 an in-house ImageJ macro. Binary masks were created to separate a single cellular structure  
630 from the non-cellular background.

## 631 **Cryo-SEM Sample Preparation and Imaging**

632 All samples for cryo-scanning electron microscopy (SEM) were prepared by using a Leica EM  
633 HPM100 high-pressure freezing (HPF) system. The HPF planchettes were washed in ethanol



634 and exposed to an oxygen plasma for ten minutes before use. The frozen-hydrated samples  
635 were stored in liquid nitrogen. A Leica VCT-100 system was used for subsequent cryo-transfer  
636 and cryo-imaging. Samples were transferred and coated with sputtered gold (Au) (2.5 nm)  
637 under cryogenic conditions ( $T < -135$  °C) by a Leica EM MED020 system. Before SEM  
638 imaging, sublimation was used to create topographic contrast by slightly warming frozen-  
639 hydrated samples. SEM imaging was done by using a Zeiss Auriga Crossbeam FIB-SEM  
640 equipped with a Schottky field-emission electron gun (FEG) and an Oxford Max-80 ultrathin  
641 window (UTW) silicon-drift detector (SDD) interfaced to an Oxford INCA EDS system.  
642 Secondary electron imaging (Everhart-Thornley detector) was done by using 2 keV electrons  
643 and a 2.5 nm Au coating.

#### 644 **Assessment of ECM network in MG with OCT**

645 A spectral-domain OCT system with a central wavelength of approximately 850 nm was used  
646 for MG imaging. The system provides an axial resolution of approximately 9  $\mu\text{m}$  in biological  
647 samples (1.4 refractive indexes assumed) and a transverse resolution of approximately 5  $\mu\text{m}$ .  
648 Parameters for imaging of 2% (v/v) and 25% (v/v) MG samples were kept identical. Data  
649 processing focused on the characterization of the spatial frequency over depth, similar to a  
650 previously developed method.<sup>[63]</sup> Briefly, with the dB intensity A-scan and the identified  
651 sample surface, the intensity profile over 0.4 mm starting at approximately 26  $\mu\text{m}$  below the  
652 sample surface was utilized for analysis. The slope of the signal that represents the optical  
653 attenuation over depth was removed. Through a fast Fourier transform, the amplitude spectrum  
654 of the spatial frequency was obtained, and an exponential fit of the local peaks was performed.  
655 The exponential decay coefficient was calculated as the measure of the spatial frequency over  
656 depth and was used to compare the 2% (v/v) and 25% (v/v) MG samples. A higher decay  
657 coefficient represents relatively stronger low-frequency components of the spatial frequency  
658 spectrum.

#### 659 **Rotational Rheology**

660 The linear viscoelastic material functions, the storage modulus,  $G'$ , and the loss modulus,  $G''$ ,  
661 of the 2% (v/v), 25% (v/v) MG samples, as well as ascitic fluids isolated from OC patients,  
662 were characterized using an Advanced Rheometric Expansion System (ARES) rheometer  
663 available from TA Instruments of New Castle, DE. The rotational rheometer was used with  
664 stainless steel parallel disks with a 25 mm diameter and had a force rebalance transducer 0.2K-  
665 FRTN1. The actuator of the ARES is a DC servomotor with a shaft supported by an air bearing

666 with an angular displacement range of  $5 \times 10^{-6}$  to 0.5 rad, and an angular frequency range of  
667  $1 \times 10^{-5}$  to 100 rad/s. The angular velocity range is  $1 \times 10^{-6}$  to 200 rad/s. The sample loading  
668 procedure was the same for all the experiments, and the gap height between two disks was kept  
669 constant at 1 mm. A sufficient volume of sample was used to fill the gap between parallel disks,  
670 and the linear viscoelastic properties of the samples were collected as a function of frequency  
671 at a constant strain of 50% and room temperature. The samples were not pre-sheared. For  
672 discussion of dynamic property characterization of complex fluids see, for example, Bird, R.B.,  
673 Armstrong, R.C., and Hassager, O. “Dynamics of Polymeric Liquids. Wiley, 1987.”

#### 674 **Matrigel® (MG) Overlay**

675 MG was diluted with an appropriate prechilled medium and a sterile and precooled pipette tip  
676 to a final concentration of 2% (v/v) or 25% (v/v). After cell attachment, the medium was  
677 aspirated from the 96-well plates and the medium/MG mixture was overlaid onto the cell  
678 monolayer. MG-treated cultures were allowed to incubate overnight before proceeding with  
679 live-cell time-lapse imaging or incubated for 72 h before fixation and IF staining. The  
680 procedure as described produces a coat of matrix that gels at 37°C and attaches to the upper  
681 surface of the monolayer.<sup>[41]</sup>

#### 682 **Processing of spheroids for EdU labeling**

683 Hey-A8 spheroids were fixed in a 4% (v/v) paraformaldehyde solution (Sigma-Aldrich®) and  
684 dehydrated in ethanol. HistoGel™ (Thermo Fisher Scientific®) was liquified, and spheroids  
685 were mixed with HistoGel™ and left to solidify in a biopsy cassette. HistoGel™ blocks were  
686 fixed in 10% (v/v) neutral-buffered formalin overnight, then dehydrated in ethanol and cleared  
687 in xylene. Processed HistoGel™ blocks were then embedded in paraffin and stored at -20 °C  
688 until the time of sectioning. Paraffin blocks were sectioned at a thickness of 5 µm using a  
689 microtome (Leica).

#### 690 **EdU incorporation assay**

691 MG reconstituted Hey-A8 cells were incubated with 10 mM Click-iT™ EdU [Thermo Fisher  
692 Scientific®, catalog #: C10340] for 4 hours. Cells were fixed with 4% (v/v) PFA for 1 hour at  
693 room temperature, embedded into HistoGel™, and sectioned. Sections were permeabilized  
694 with 1X PBS containing 0.5% (v/v) Triton-X. Residual Triton-X was removed by washing  
695 twice with 1X PBS supplemented with 3% (w/v) BSA. To label the incorporated EdU, sections  
696 were incubated in the dark for 30 minutes with a Click-iT reaction cocktail prepared fresh (<15  
697 minutes before labeling). The Click-iT reaction cocktail was then removed, and sections were

698 washed with 1X PBS. To label total cell nuclei, sections were incubated in the dark with 10  
699  $\mu\text{g}/\text{mL}$  Hoechst 33342 in 1X PBS for 30 minutes. After washing out the Hoechst dye with 1X  
700 PBS, sections were mounted with aqueous mounting media and sealed by coverslips. The  
701 sections were imaged on ZEISS LSM-880 confocal microscope using a 10X objective. Images  
702 of EdU-labeled nuclei were acquired using far-red laser illumination ( $\lambda = 647 \text{ nm}$ ) and total  
703 nuclei were captured by violet-blue laser illumination ( $\lambda = 405 \text{ nm}$ ). Images were analyzed  
704 using the open-source software FIJI.<sup>[62]</sup>

### 705 **Cell proliferation, cell motion imaging, and quantifications**

706 Monolayers of FNE-m-p53 or Hey-A8 cells expressing GFP or mKO2, respectively, were  
707 overlaid with MG. Time-lapse imaging was performed on an Agilent® BioTek® Lionheart™  
708 FX automated microscope using a 10X objective and a maximal capture interval of 22 minutes.  
709 After the acquisition, time-lapse images were background subtracted (radius 50 pixels) using  
710 FIJI<sup>[62]</sup> image analysis software. To analyze cell proliferation and movement within MG-  
711 overlaid cell cultures, we used an ImageJ plugin, TrackMate,<sup>[64]</sup> to perform single-particle  
712 tracking (SPT). TrackMate offers multiple modes of analysis and based on both our cell size  
713 and the relatively slow movement of cells, we selected and applied the following parameters  
714 in TrackMate: LoG (Laplacian of Gaussian) detector, the spot diameter of 35 pixels, threshold  
715 of 10, median filter and LAP tracker with 15-pixel frame linking, 2-frame gap distance and  
716 track-segment splitting. We extracted the spot count in the desired time frames (one count every  
717 12 hours or 33 frames) to obtain the number of cells or spots in the region of interest at those  
718 time points. We then divided the number of cells in each time point by the number of cells at  
719 the starting time point (time = 0) to normalize and plot it as a measure of fold change. An  
720 unpaired, two-tailed t-test was used to assess the significance of fold change in cell number  
721 between the first and final time points. Plotting and statistical analysis were conducted using  
722 GraphPad Prism [version 9.1.0 for Windows, GraphPad Software, San Diego, California USA,  
723 [www.graphpad.com](http://www.graphpad.com)]. To quantify track displacement, we calibrated the images by converting  
724 output in pixels into micrometers, and frames into hours. For visualization of local tracks, we  
725 used 50-frame-depth-, time-color-coded tracks overlaid on a GFP or RFP channel time-lapse.  
726 For trajectory classification, we used the TraJClassifier plugin.<sup>[65]</sup> The plugin uses TrackMate  
727 output data and trajectories and computes a confinement ratio representing cell directionality  
728 over time. After all the trajectories were computed into confinement ratios, we plotted the data  
729 using Prism GraphPad Prism 9.1.0. Trajectories from multiple fields of view were plotted and  
730 directed-motion trajectories were represented as confinement ratio values. Each dot in a dot

731 plot represents one field of view with the horizontal line depicting the mean of all fields of  
732 view per condition. Statistical analysis was computed using an unpaired, two-tailed t-test.

### 733 **Ascites and solid carcinoma tissue collection**

734 Ascitic fluids were collected from patients with ovarian cancer either by paracentesis under  
735 local anesthesia or at the very beginning of surgery. Ascites was centrifuged at 1,100 x g for  
736 10 min at room temperature to remove cell clusters, then aliquoted and stored at -80 °C until  
737 analysis. All solid tissue collections were performed during surgery. All procedures performed  
738 in studies involving human participants were following the ethical standards of the institutional  
739 and national research committee and with the 1964 Helsinki declaration and its later  
740 amendments or comparable ethical standards. Patients provided a signed informed consent,  
741 approved by the Ethics Review Board of Poznań University of Medical Sciences (Consent No  
742 737/17).

### 743 **Immunofluorescence staining**

744 MG overlaid 2D cultures or spheroid cultures were washed thrice with PBS, fixed in 4%  
745 paraformaldehyde for 15-30 min at room temperature. Following blocking with 2.5% normal  
746 goat serum for 60 min, cells were incubated with indicated primary antibodies for 1 h at room  
747 temperature. Following PBS washes, cells were incubated with secondary antibody tagged with  
748 fluorescein diluted at 1:500 in PBS. For nuclear staining, Hoechst was used. Immunostained  
749 samples were examined under ZEISS LSM-880, the confocal laser scanning microscope  
750 (CLSM).

### 751 **N-cadherin quantification**

752 Still images of HeyA8 spheroids reconstituted with 2% or 25% MG and stained with N-  
753 cadherin and DAPI were acquired on laser scanning confocal microscope (ZEISS LSM 880)  
754 using 20x objective. Still images were collected as Z-stacks which were later projected after  
755 acquisition using standard deviation projection mode with image analysis software Fiji.<sup>[62]</sup> As  
756 the Hey-A8 spheroids were too large to fit into a single image frame using the 20x objective,  
757 we focused on imaging the spheroid edges, capturing different edges of spheroids in multiple  
758 frames. To quantify the level of N-cadherin staining strictly at the spheroid edge, we manually  
759 selected the region of the edge and measured the raw integrated density of the N-cadherin  
760 channel (547 nm) and the DAPI channel (405 nm). To account for the different size of the  
761 region and varying number of cells in each region, we first normalized the raw integrated  
762 density to the region area (in pixels) and then normalized that value from the N-cadherin

763 channel (547 nm) to the DAPI channel (405 nm). Normalized N-cadherin value was plotted  
764 using Prism GraphPad Prism [version 9.1.0 for Windows, GraphPad Software, San Diego,  
765 California USA, [www.graphpad.com](http://www.graphpad.com)]. Each value on the plot represents one spheroid edge  
766 with the bar height depicting the mean of all edges taken per condition with error bars as  
767 standard deviation. A total of 31 – 43 edges were quantified per condition, corresponding to 16  
768 – 19 Hey-A8 spheroids per condition. Statistical analysis was performed using the Ordinary  
769 One-way ANOVA function of GraphPad Prism [version 9.1.0 for Windows, GraphPad  
770 Software, San Diego, California USA, [www.graphpad.com](http://www.graphpad.com)].

### 771 **Focal adhesion quantification**

772 Still images of FNE m-p53 and Hey-A8 cells overlaid with 2% or 25% Matrigel and stained  
773 with paxillin, phalloidin (F-actin) and Hoechst 33342 were acquired on laser scanning confocal  
774 microscope (ZEISS LSM 880) using 20x objective. Still images were collected as Z-stacks  
775 which were later projected after acquisition using maximum projection mode with image  
776 analysis software Fiji.<sup>[62]</sup> To quantify number of focal adhesion foci we used an ImageJ plugin  
777 TrackMate,<sup>[64]</sup> a readily available tool to perform a range of operations from particle detection  
778 to single particle tracking (SPT). TrackMate offers multiple modes of analysis and based on  
779 intensity and size of our paxillin foci, we selected and applied the following parameters in  
780 TrackMate: LoG (Laplacian of Gaussian) detector, estimated object diameter of 1 micron,  
781 quality threshold 20, with applied median filter. We applied this setting to each ROI we imaged.  
782 To account for the varying number of cells in each ROI, we normalized the total number of  
783 focal adhesion (paxillin) foci detected to the total number of nuclei in the respective ROI, which  
784 we counted using the TrackMate thresholding detector with auto intensity threshold.  
785 Normalized number of focal adhesion foci was then plotted using Prism GraphPad Prism  
786 [version 9.1.0 for Windows, GraphPad Software, San Diego, California USA,  
787 [www.graphpad.com](http://www.graphpad.com)]. Each value on the plot represents one ROI with the bar height depicting  
788 the mean of all ROIs per condition, with error bars as standard deviation. A total of 10 ROIs  
789 were quantified per condition, ranging between 12 – 376 cells per ROI. Statistical analysis was  
790 performed using the Ordinary One-way ANOVA function of GraphPad Prism [version 9.1.0  
791 for Windows, GraphPad Software, San Diego, California USA, [www.graphpad.com](http://www.graphpad.com)].

### 792 **PAX8 quantification for stroma invasion**

793 Using FIJI (Fiji is just ImageJ) software,<sup>[62]</sup> multiple ROIs representing tumor, stroma, or Villi  
794 small intestine were selected. Integrated density "IntDen" (the product of Area and Mean Gray

795 Value)<sup>[62]</sup> was calculated for each ROI subsequently plotted. Statistical analysis was performed  
 796 using the Ordinary One-way ANOVA function of GraphPad Prism [version 9.1.0 for Windows,  
 797 GraphPad Software, San Diego, California USA, [www.graphpad.com](http://www.graphpad.com)]. ANOVA was followed  
 798 by Tukey post-hoc analysis.

799 **Statistical analysis**

| <b>Figure</b> | <b>Pre-processing</b>                                                 | <b>Data presentation</b>                              | <b>Sample size (n) / ROI = region of interest (microscopic field of view)</b> | <b>Statistical methods</b>                                 | <b>Software used</b> |
|---------------|-----------------------------------------------------------------------|-------------------------------------------------------|-------------------------------------------------------------------------------|------------------------------------------------------------|----------------------|
| 1-G           | Intensity values normalized to background level (area without tissue) | All data are shown with bars indicating mean $\pm$ SD | Each data point is one ROI. 51 ROI/condition (tumor and stroma)               | An unpaired, two-tailed, non-parametric, Mann-Whitney test | Prism (GraphPad)     |
| 1-H           | Intensity values normalized to background level (area without tissue) | All data are shown with bars indicating mean $\pm$ SD | Each data point is one ROI. 59 ROI/condition (tumor and stroma)               | An unpaired, two-tailed, non-parametric, Mann-Whitney test | Prism (GraphPad)     |
| 1-I           | Intensity values normalized to background level (area without tissue) | All data are shown with bars indicating mean $\pm$ SD | Each data point is one ROI. 38 ROI/condition (tumor and stroma)               | An unpaired, two-tailed, non-parametric, Mann-Whitney test | Prism (GraphPad)     |

|     |                                                                                                                                                |                                                       |                                                                                     |                                                                            |                  |
|-----|------------------------------------------------------------------------------------------------------------------------------------------------|-------------------------------------------------------|-------------------------------------------------------------------------------------|----------------------------------------------------------------------------|------------------|
| 1-J | Intensity values normalized to background level (area without tissue)                                                                          | All data are shown with bars indicating mean $\pm$ SD | Each data point is one ROI. 45 ROI/condition (tumor and stroma)                     | An unpaired, two-tailed, non-parametric, Mann-Whitney test                 | Prism (GraphPad) |
| 2-D | None<br>H-score = [(0 x % negative cells) + (1 x %weakly positive cells) + (2 x %moderately positive cells) + (3 x %strongly positive cells)]. | All data are shown with bars indicating mean $\pm$ SD | Each data point is a patient sample represented by the H-score. N=3 patient samples | Wilcoxon sum rank                                                          | MATLAB           |
| 2-E | Intensity values normalized to background level (area without tissue)                                                                          | All data are shown with bars indicating mean $\pm$ SD | Each data point is one ROI<br>BEFORE=82<br>AFTER=160                                | An unpaired, two-tailed, parametric student t-test with Welch's correction | Prism (GraphPad) |
| 3-C | Final spheroid area was normalized to initial spheroid area within the timelapse movie                                                         | All data are shown with bars indicating mean $\pm$ SD | Each data point is one spheroid.<br>8 FNE spheroids vs. 10 FNE m-p53 spheroids      | An unpaired, two-tailed, parametric student t-test with Welch's correction | Prism (GraphPad) |
| 3-D | None                                                                                                                                           | All data are shown with bars indicating mean          | >30 spheroids                                                                       | None                                                                       | Prism (GraphPad) |

|     |                                                                                                                                        |                                                       |                                                                                   |                                                                            |                  |
|-----|----------------------------------------------------------------------------------------------------------------------------------------|-------------------------------------------------------|-----------------------------------------------------------------------------------|----------------------------------------------------------------------------|------------------|
| 3-E | None                                                                                                                                   | All data are shown with bars indicating mean          | 20-30 spheroids                                                                   | None                                                                       | Prism (GraphPad) |
| 4-C | Cleared (non-GFP) area of mesothelial cell monolayer at last time point of the experiment were normalized to the primary spheroid area | All data are shown with bars indicating mean $\pm$ SD | Each data point is one structure. 69 spheroids vs. 43 outgrowths                  | An unpaired, two-tailed, non-parametric, Mann-Whitney test                 | Prism (GraphPad) |
| 4-E | RFP intensity values (of main spheroid or outgrowth) were normalized to the area of the spheroid or outgrowth                          | All data are shown with bars indicating mean $\pm$ SD | Each data point is one structure. 21 spheroids vs. 22 outgrowths                  | An unpaired, two-tailed, non-parametric, Mann-Whitney test                 | Prism (GraphPad) |
| 5-A | None                                                                                                                                   | All data are shown with bars indicating mean $\pm$ SD | Each data point is one structure. 11 spheroids in 2% MG vs. 8 spheroids in 25% MG | An unpaired, two-tailed, parametric student t-test with Welch's correction | Prism (GraphPad) |
| 5-B | None                                                                                                                                   | All data are shown with bars indicating mean $\pm$ SD | Each data point is one spheroid structure. 19 spheroids in 2% MG vs.              | An unpaired, two-tailed, parametric student t-test with Welch's correction | Prism (GraphPad) |



|        |      |                                                                        |                                                                                                                                                        |                                                                            |                     |
|--------|------|------------------------------------------------------------------------|--------------------------------------------------------------------------------------------------------------------------------------------------------|----------------------------------------------------------------------------|---------------------|
|        |      |                                                                        | 20 spheroids<br>in 25% MG                                                                                                                              |                                                                            |                     |
| 6-A-F  | None | All data points are shown as the mean and SD of triplicate measurement | total triplicate measurement<br>91- 2% MG<br>41- 25% MG<br>91- Ascites                                                                                 | None                                                                       | Prism<br>(GraphPad) |
| 7-C, E | None | All data points are shown with bars indicating mean $\pm$ SD           | Each dot represents one ROI that contains 20-100 cells. Two independent experiments were performed with a total of 12-30 ROI/condition (2% vs. 25% MG) | An unpaired, two-tailed, parametric student t-test with Welch's correction | Prism<br>(GraphPad) |
| S1-A   | None | All data are shown with bars indicating mean $\pm$ SD                  | Each data point is one spheroid.<br>10 spheroids in 2% MG vs. 8 spheroids in 25% MG                                                                    | An unpaired, two-tailed, parametric student t-test with Welch's correction | Prism<br>(GraphPad) |
| S1-B   | None | All data are shown with bars indicating                                | Each data point is one spheroid.<br>10 spheroids                                                                                                       | An unpaired, two-tailed, parametric student t-test                         | Prism<br>(GraphPad) |

|      |                                                                                                           |                                                       |                                                                                                                                                          |                                                                            |                  |
|------|-----------------------------------------------------------------------------------------------------------|-------------------------------------------------------|----------------------------------------------------------------------------------------------------------------------------------------------------------|----------------------------------------------------------------------------|------------------|
|      |                                                                                                           | mean $\pm$ SD                                         | in 2% MG vs. 16 spheroids in 25% MG                                                                                                                      | with Welch's correction                                                    |                  |
| S2   | Normalization of N-cadherin signal to Hoechst signal in same ROI                                          | All data are shown with bars indicating mean $\pm$ SD | Each data point is one structure. 19 spheroids / condition (2% vs. 25% MG)                                                                               | An unpaired, two-tailed, non-parametric, Mann-Whitney test                 | Prism (GraphPad) |
| S3-B | Normalization of cell number in end frame to cell number in the first frame in the same ROI (fold change) | All data are shown with bars indicating mean $\pm$ SD | Each dot corresponds to one ROI containing 2-116 cells. Two independent experiments were performed with a total of 15-20 ROI / condition (2% vs. 25% MG) | An unpaired, two-tailed, parametric student t-test with Welch's correction | Prism (GraphPad) |
| S3-C | Normalization of cell number in end frame to cell number in the first frame in the same ROI (fold change) | All data are shown with bars indicating mean $\pm$ SD | Each dot corresponds to one ROI containing 3-108 cells. Two independent experiments were performed with a total of 15 ROI /                              | An unpaired, two-tailed, parametric student t-test with Welch's correction | Prism (GraphPad) |

|      |                                                                                             |                                                                        |                                                                                                                                                   |                                                                            |                  |
|------|---------------------------------------------------------------------------------------------|------------------------------------------------------------------------|---------------------------------------------------------------------------------------------------------------------------------------------------|----------------------------------------------------------------------------|------------------|
|      |                                                                                             |                                                                        | condition (2% vs. 25% MG)                                                                                                                         |                                                                            |                  |
| S3-E | Normalization of the number of EdU positive nuclei to the total number of nuclei            | All data are shown with bars indicating mean $\pm$ SD                  | 23 HeyA8 spheroids in 2% MG vs. 34 HeyA8 spheroids in 25% MG                                                                                      | An unpaired, two-tailed, non-parametric, Mann-Whitney test                 | Prism (GraphPad) |
| S4   | None                                                                                        | All data points are shown as the mean and SD of triplicate measurement | total triplicate measurement 61- Ascites 2&3                                                                                                      | None                                                                       | Prism (GraphPad) |
| S6   | Normalization of the number of paxillin foci in ROI to the number of nuclei in the same ROI | All data are shown with bars indicating mean $\pm$ SD                  | Each data point is one ROI containing 31-376 cells. Two independent experiments were performed with a total of 10 ROI / condition (2% vs. 25% MG) | An unpaired, two-tailed, parametric student t-test with Welch's correction | Prism (GraphPad) |
| S7   | Normalization of the number of paxillin foci in ROI to the                                  | All data are shown with                                                | Each data point is one ROI (12-149                                                                                                                | An unpaired, two-tailed, parametric                                        | Prism (GraphPad) |

|    |                                                                       |                                                   |                                                                                                    |                                                                                                                                                                                                                                                              |                  |
|----|-----------------------------------------------------------------------|---------------------------------------------------|----------------------------------------------------------------------------------------------------|--------------------------------------------------------------------------------------------------------------------------------------------------------------------------------------------------------------------------------------------------------------|------------------|
|    | number of nuclei in the same ROI                                      | bars indicating mean $\pm$ SD                     | cells). Two independent experiments were performed with a total of 9 ROI/condition (2% vs. 25% MG) | student t-test with Welch's correction                                                                                                                                                                                                                       |                  |
| S8 | Logarithmic transformation (log base 10) of integrated density values | All data points are shown as median and quartiles | Each data point is one ROI. Tumor 66 ROI Stroma 20 ROI Villi 20 ROI                                | Ordinary one-way ANOVA test was used to examine statistical differences between data sets. ANOVA was followed by Tukey post hoc analysis; Tumor vs. Stroma P < 0.001, Tumor vs. Villi small intestine P < 0.001, Stroma vs. Villi small intestine P > 0.999. | Prism (GraphPad) |

800

801 **Reagents and materials:**

| Item  | Cat. No.   | Vendor        |
|-------|------------|---------------|
| PAX8  | 10336-1-AP | Protein tech. |
| LAMC1 | HPA 001909 | Sigma Aldrich |

|                                     |                |                       |
|-------------------------------------|----------------|-----------------------|
| VECTASTAIN Elite ABC HRP            | PK-6101        | vector laboratories   |
| ImmPACT DAB                         | SK-4105        | vector laboratories   |
| Hematoxylin QS                      | H-3404-100     | vector laboratories   |
| picrosirius red                     | 24901          | Polysciences Inc.     |
| non-aqueous mounting medium         | H-5000         | vector laboratories   |
| Aqueous mounting medium             | H-5501         | vector laboratories   |
| Medium 199                          | AT014-5L       | Himedia               |
| MCDB105                             | M6396-10X1L    | Sigma Aldrich         |
| Heat Inactivated Fetal bovine serum | 10438-026500mL | Gibco                 |
| Plasmocin prophylactic              | ant-mpp        | In vivo Gen           |
| Penicillin-Streptomycin             | 30-002-CI      | Corning               |
| DMEM/F12                            | AT147A-10L     | Himedia               |
| 17 beta-estradiol                   | 15600          | USB                   |
| triiodothyronine                    | T6397-100MG    | Sigma Aldrich         |
| all-trans retinoic acid             | 216220-250MG   | BeanTown Chemical     |
| EGF                                 | 100-26-25UG    | Peprotech             |
| hydrocortisone                      | H088-1G        | Sigma Aldrich         |
| cholera toxin                       | C8052          | Sigma Aldrich         |
| Matrigel                            | 354230         | Corning               |
| ultra-low attachment 96-well plates | 7007           | Corning               |
| Trypsin                             | 25-053-CI      | Corning               |
| Insulin                             | I9278-5ML      | Sigma Aldrich         |
| Histogel                            | HG-4000-012    | Thermo Scientific     |
| Formalin                            | VT450C         | Lam Chem              |
| Xylene                              | 89370-088      | VWR                   |
| Ethanol                             | 241000200CSGL  | GREENFIELD GLOBAL INC |
| PBS                                 | 21-040-CV      | Corning               |
| Propidium iodide                    | P1304MP        | Molecular Probes      |
| EDU kit                             | C10640         | LIFE TECHNOLOGIES     |
| N-Cadherin                          | C3865          | Sigma Aldrich         |
| Paxillin                            | 610051         | BD Pharmingen         |
| Phalloidin                          | A12380         | ThermoFisher          |
| Alpha smooth muscle actin           | ab7817         | Abcam                 |

|                       |         |            |
|-----------------------|---------|------------|
| Triton-X and Tween-20 | 0777-1L | VWR        |
| Alexa fluor 488       | A11029  | Invitrogen |
| Alexa fluor 546       | A11003  | Invitrogen |
| Alexa fluor 568       | A-11031 | Invitrogen |

802 **Author Contributions:** S.A., T.P. and M.I. designed and conceptualized the studies with  
803 significant input from S.F., P.B., D.C., and D.K. IHC analysis of human tumors and PDX tissue  
804 sections were performed by S.A., and T.P. performed cell tracking experiments and image  
805 quantification. S.F. performed mesothelial clearance assays. P.B., L.Q., and D.Kh. designed  
806 and performed shear-stress rheometric analyses. P.B. and W.L. designed and performed  
807 electron microscopy experiments. M.R., P.J., E.D., E.N-M. and M.P-Z., identified human  
808 tumor samples and performed pathologic analysis of laminin  $\gamma$ 1 expression in tumors  
809 representing disease before and after chemotherapy. S.A., T.P., and M.I. wrote a manuscript  
810 with significant input (methodology description) from S.F., P.B., L.Q., D.Kh., S.W., and M.P-  
811 Z.

812 **Acknowledgments.** We would like to thank Dr. Shang Wang for assisting with OCT  
813 experiments and help with writing the relevant methodology and the interpretation of the  
814 results. We thank the Stevens Institute of Technology, Multiscale Imaging Center led by Dr.  
815 Matthew Libera. We are especially grateful for technical help with sample preparation and  
816 processing that was provided by Dr. Tsengming Chou. We thank Thomas Cattabiani for  
817 editorial help with the manuscript preparation. This study was supported by NIH/NCI  
818 R21CA256615 (M.I.) and Kaleidoscope of Hope Ovarian Cancer Foundation (M.I.).

819 **Competing Interest Statement.** The authors declare no competing interests.

820 **Supplementary Figures**

A

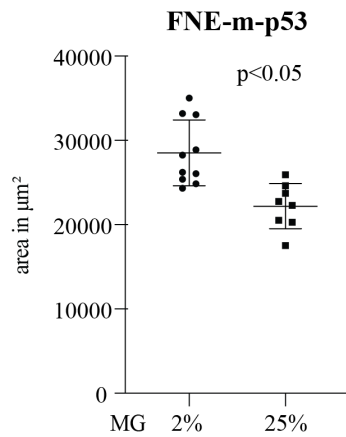

B

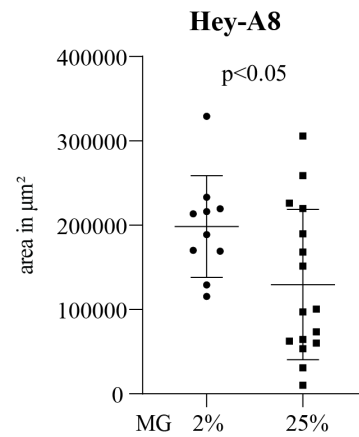

821 **S. Figure 1.** Elevation of ECM concentration suppresses FNE-m-p53 and Hey-A8 structure expansion.  
822 Quantification of an area in (A) FNE-m-p53 or (B) Hey-A8 spheroids reconstituted with 2% or 25% MG. Each  
823 dot represents a spheroid (8-16 spheroid/condition) measured 9 days after starting the culture. All data are shown  
824 with bars indicating mean  $\pm$  SD. An unpaired, two-tailed, parametric student t-test with Welch's correction was  
825 used to examine statistical differences between data sets.

## Hey-A8

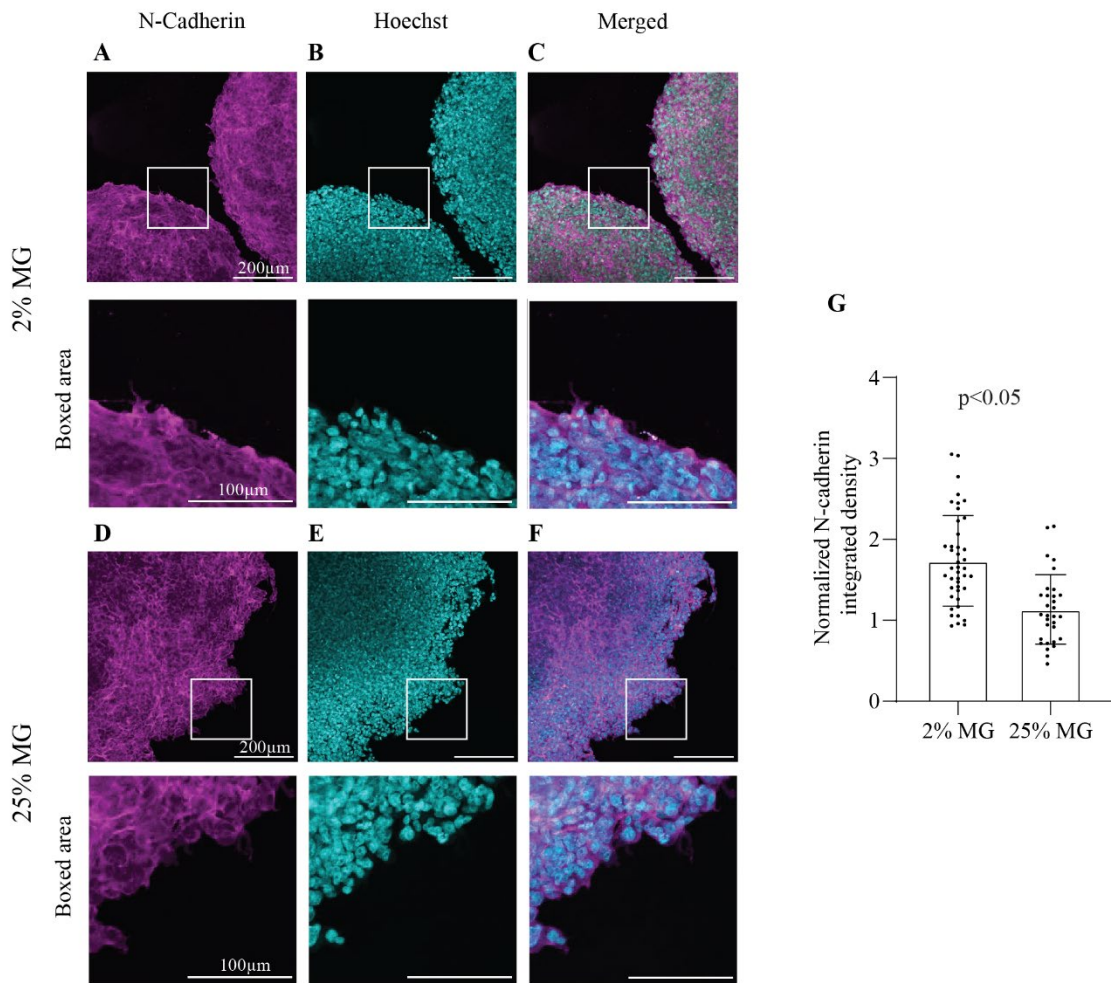

826 **S. Figure 2.** Increased ECM concentration leads to reduced N-cadherin expression at the 3D OC spheroid surface  
827 edge. Hey-A8 spheroids were reconstituted with (A, B, C) 2% MG or (D, E, F) 25% MG and stained with (A,  
828 D) antibodies against N-cadherin, and (B, E) Hoechst 33342 dye. (G) Quantification of N-cadherin expression on  
829 the edges of Hey-A8 spheroids reconstituted with 2% or 25% MG, respectively. Each data point is one ROI (1-5  
830 spheroid edges). Nineteen spheroids were analyzed/ condition. All data points are shown with bars indicating  
831 mean  $\pm$  SD. An unpaired, two-tailed, non-parametric, Mann-Whitney test was used to examine statistical  
832 differences between data sets. Integrated density values of N-cadherin were normalized to integrated density  
833 values of corresponding Hoechst 33342 signals.



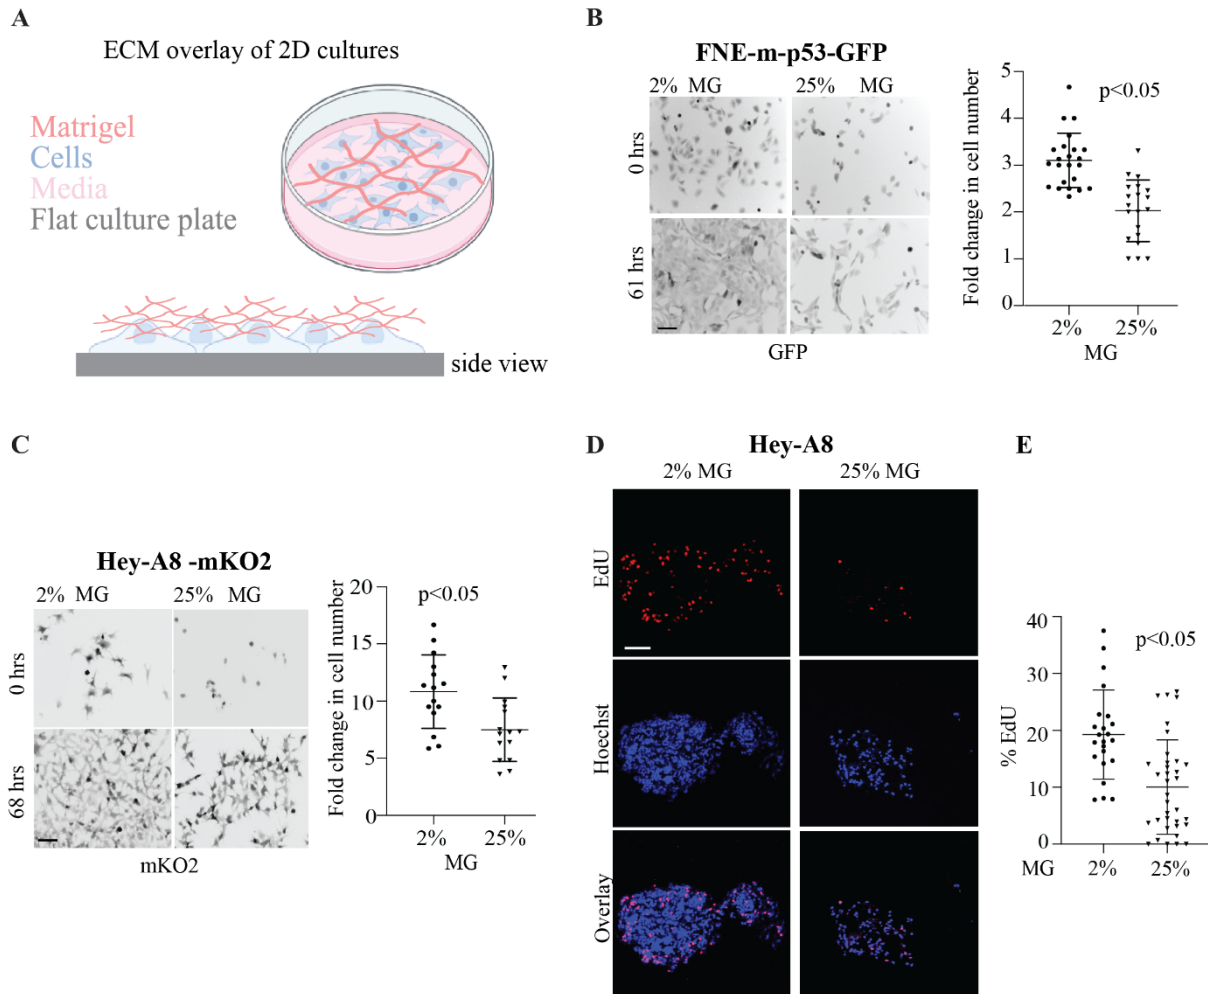

834

835 **S. Figure 3.** Elevation of ECM concentration suppresses FNE-m-p53 and Hey-A8 cell proliferation. (A) Cartoon  
836 representation of the experimental design for ECM overlay of cell monolayers. Created with BioRender.com.

837 Representative fluorescent images of (B) FNE-m-p53 expressing GFP or (C) Hey-A8 cells expressing mKO2  
838 monolayers overlaid with 2% or 25% MG. Dot plots represent a fold-change increase in cell number over time.

839 Each dot corresponds to one field of view (FOV) containing (2-116 cells) and (3-108 cells) in B and C, with a  
840 total of 15-20 FOVs/ condition (2% & 25%). Data points are presented as mean  $\pm$  SD. An unpaired, two-tailed,  
841 parametric student t-test with Welch's correction was used to compute the statistical difference.

842 Representative fluorescent images of EdU and Hoechst in Hey-A8 spheroids reconstituted with 2% and 25% MG.  
843 Spheroids were processed 9 days after starting the culture. (E) The dot plot represents the fraction of EdU-positive  
844 cells. Each dot represents a spheroid; total spheroids 23 and 34 in 2% and 25%, respectively. All data points are  
845 shown with bars indicating mean  $\pm$  SD. An unpaired, two-tailed, non-parametric, Mann-Whitney test was used to  
846 compute the statistical difference. Scale bars are 100  $\mu$ m.

A

Ascites 2

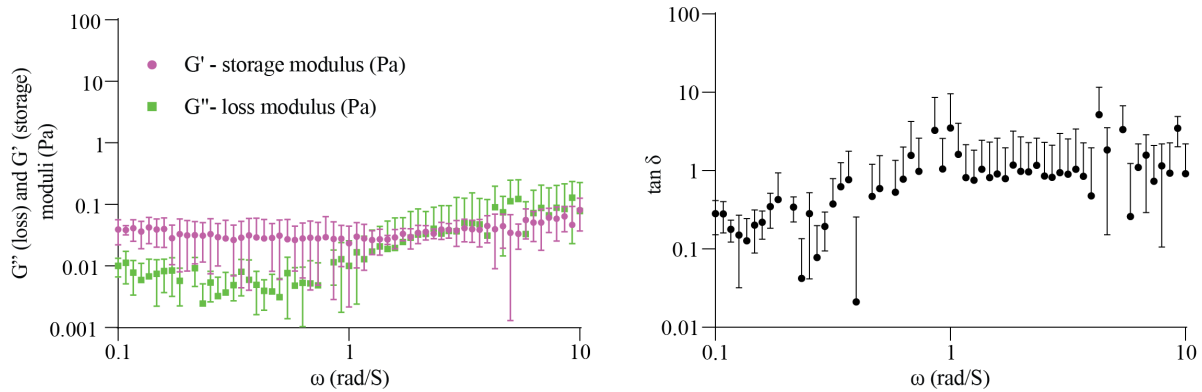

B

Ascites 3

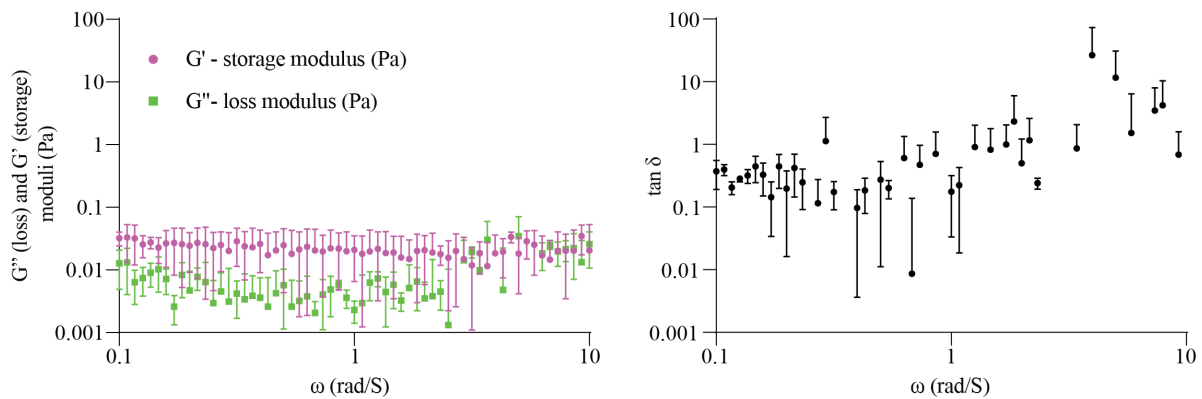

847 **S. Figure 4:** Viscoelastic properties of ascitic fluid samples isolated from OC patients with relapsed disease.  
848 Graphs represent the measurements of storage moduli (elastic), loss moduli (viscous), and  $\tan \delta$  (loss moduli  
849 divided by storage moduli) of (A&B) patient-derived ascites samples. Each data point represents the mean and  
850 SD from triplicate measurements with a total of 61 measurements.

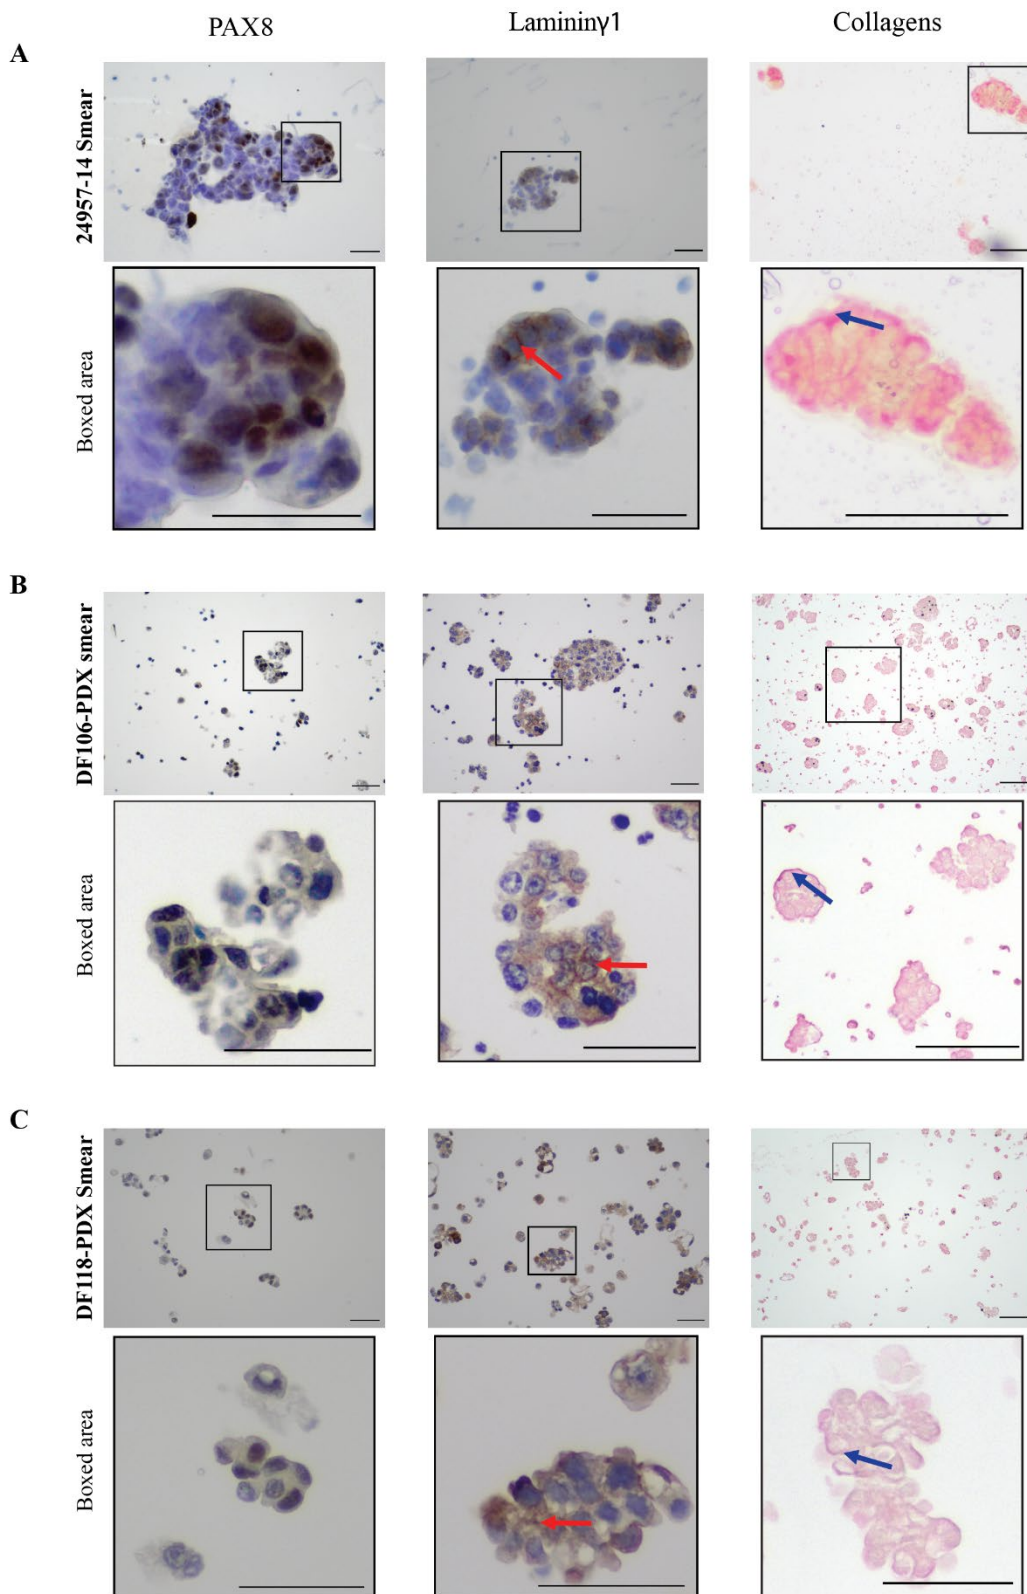

851 **S. Figure 5.** Laminin  $\gamma$ 1 and collagen expression in OC clusters isolated from human or mouse ascites.  
852 Immunocytochemistry of Laminin  $\gamma$ 1 and collagen in PAX8-positive (A) human, (B & C) PDX ascitic smears.  
853 Red arrows point to laminin $\gamma$ 1. Blue arrows point to collagen. Scale bars are 50  $\mu$ m.  
854

### FNE-m-p53

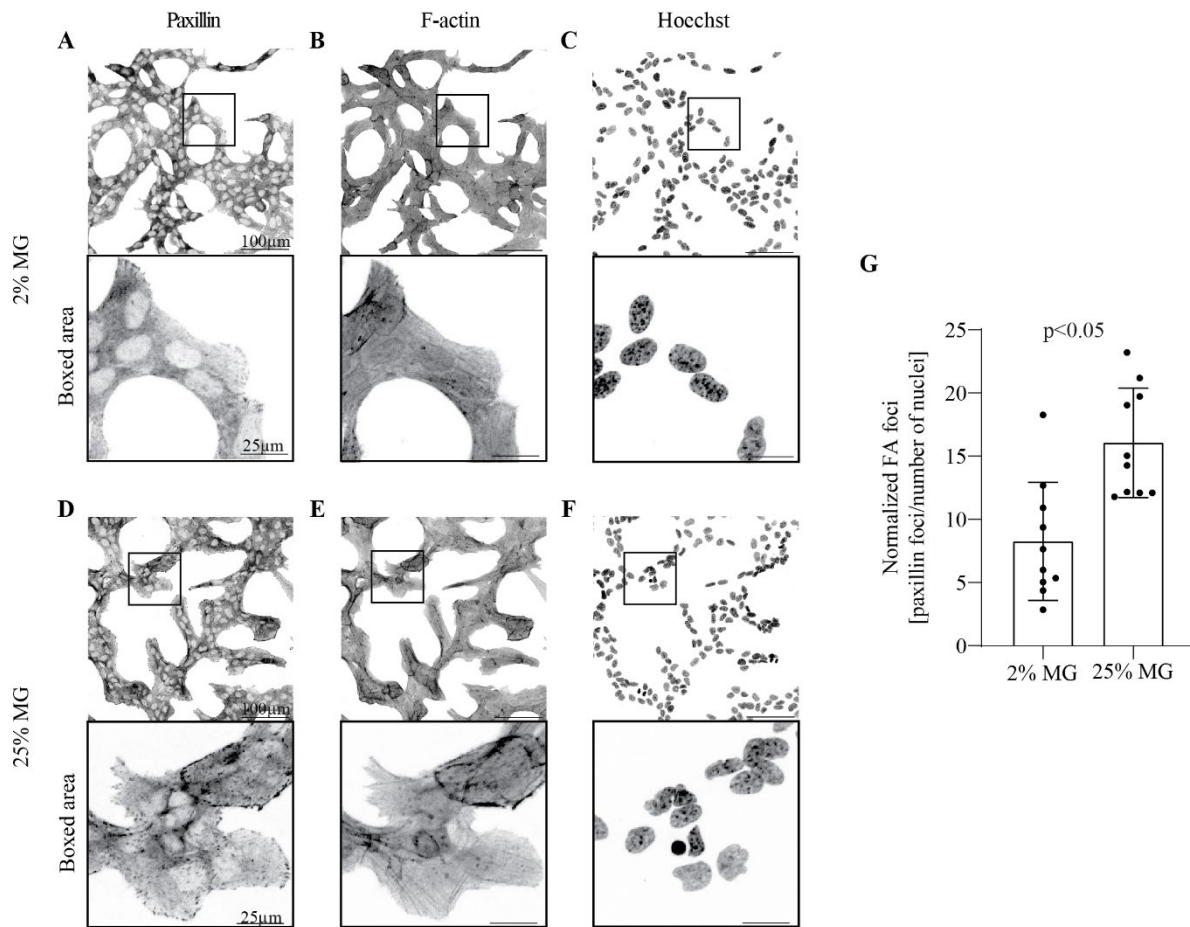

855 **S. Figure 6.** Evaluation of focal adhesions in FNE-m-p53 cells overlaid with 2% or 25% MG. (A) Adhered  
856 monolayer of FNE-m-p53 cells was overlaid with (A, B, C) 2% or (D, E, F) 25% MG for 72 hours, fixed and  
857 stained by immunofluorescence with (A, D) antibodies against paxillin, (B, E) phalloidin-FITC (binding to F-  
858 actin), and (C, F) Hoechst 33342. (G) Quantification of the number of focal adhesions observed in FNE-m-p53  
859 cells overlaid with 2% or 25% MG, respectively. Each data point corresponds to one field of view (FOV)  
860 containing (31-376 cells), with a total of 10 FOVs/ condition (2% & 25%). All data points are shown with bars  
861 indicating mean  $\pm$  SD. An unpaired, two-tailed, parametric student t-test with Welch's correction was used to  
862 examine statistical differences between data sets. Y-axis represents the number of paxillin foci normalized to the  
863 number of nuclei per ROI.

864

### Hey-A8

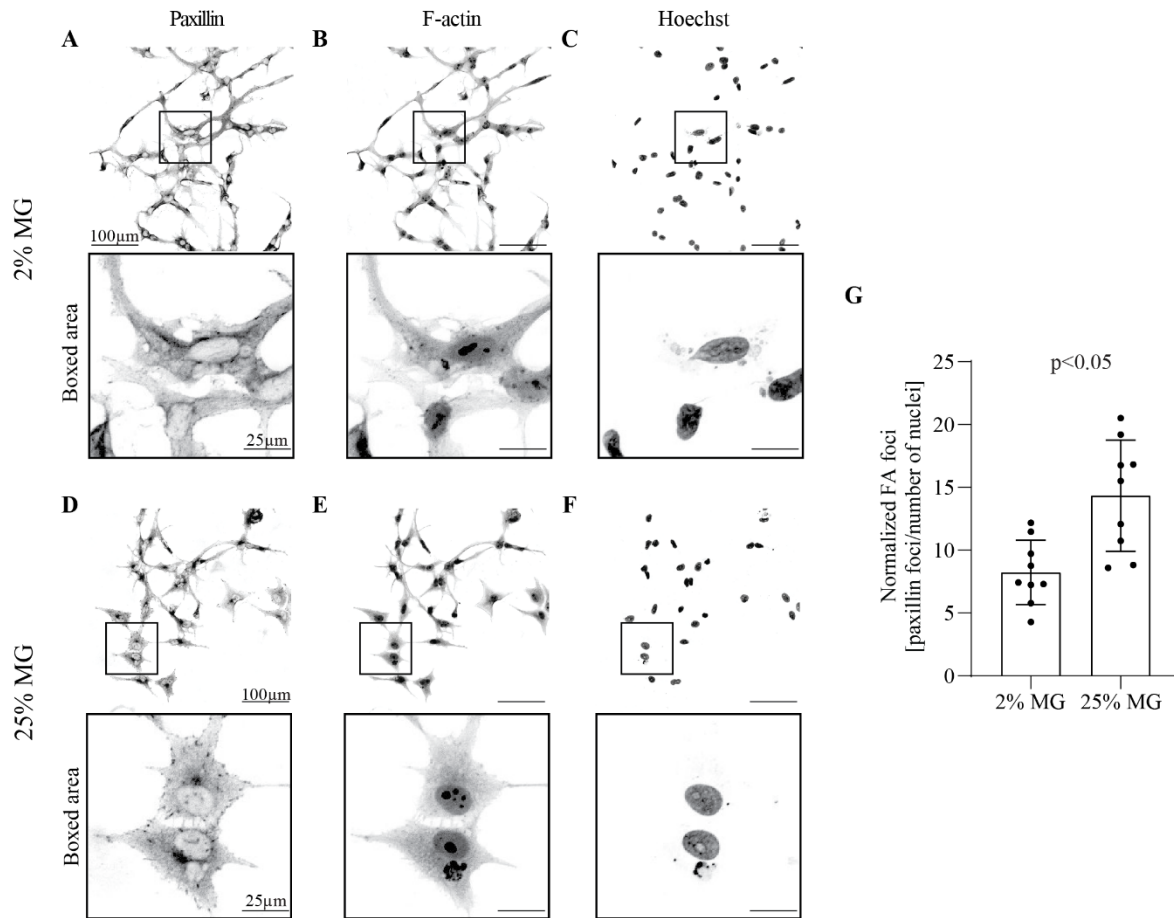

865 **S. Figure 7.** Evaluation of focal adhesions Hey-A8 monolayers overlaid with 2% or 25% MG. (A) Adhered  
866 monolayer of Hey-A8 cells was overlaid with (A, B, C) 2% or (D, E, F) 25% MG for 72 hours, fixed, and  
867 stained by immunofluorescence with (A, D) antibodies against paxillin, (B, E) phalloidin-FITC (binding to F-  
868 actin), and (C, F) Hoechst 33342. (G) Quantification of the number of focal adhesions observed in Hey-A8 cells  
869 overlaid with 2% or 25% MG, respectively. Each data point is one ROI (12-149 cells). All data points are shown  
870 with bars indicating mean  $\pm$  SD. An unpaired, two-tailed, parametric student t-test with Welch's correction was  
871 used to examine statistical differences between data sets. Y-axis represents the number of paxillin foci normalized  
872 to the number of nuclei per ROI.

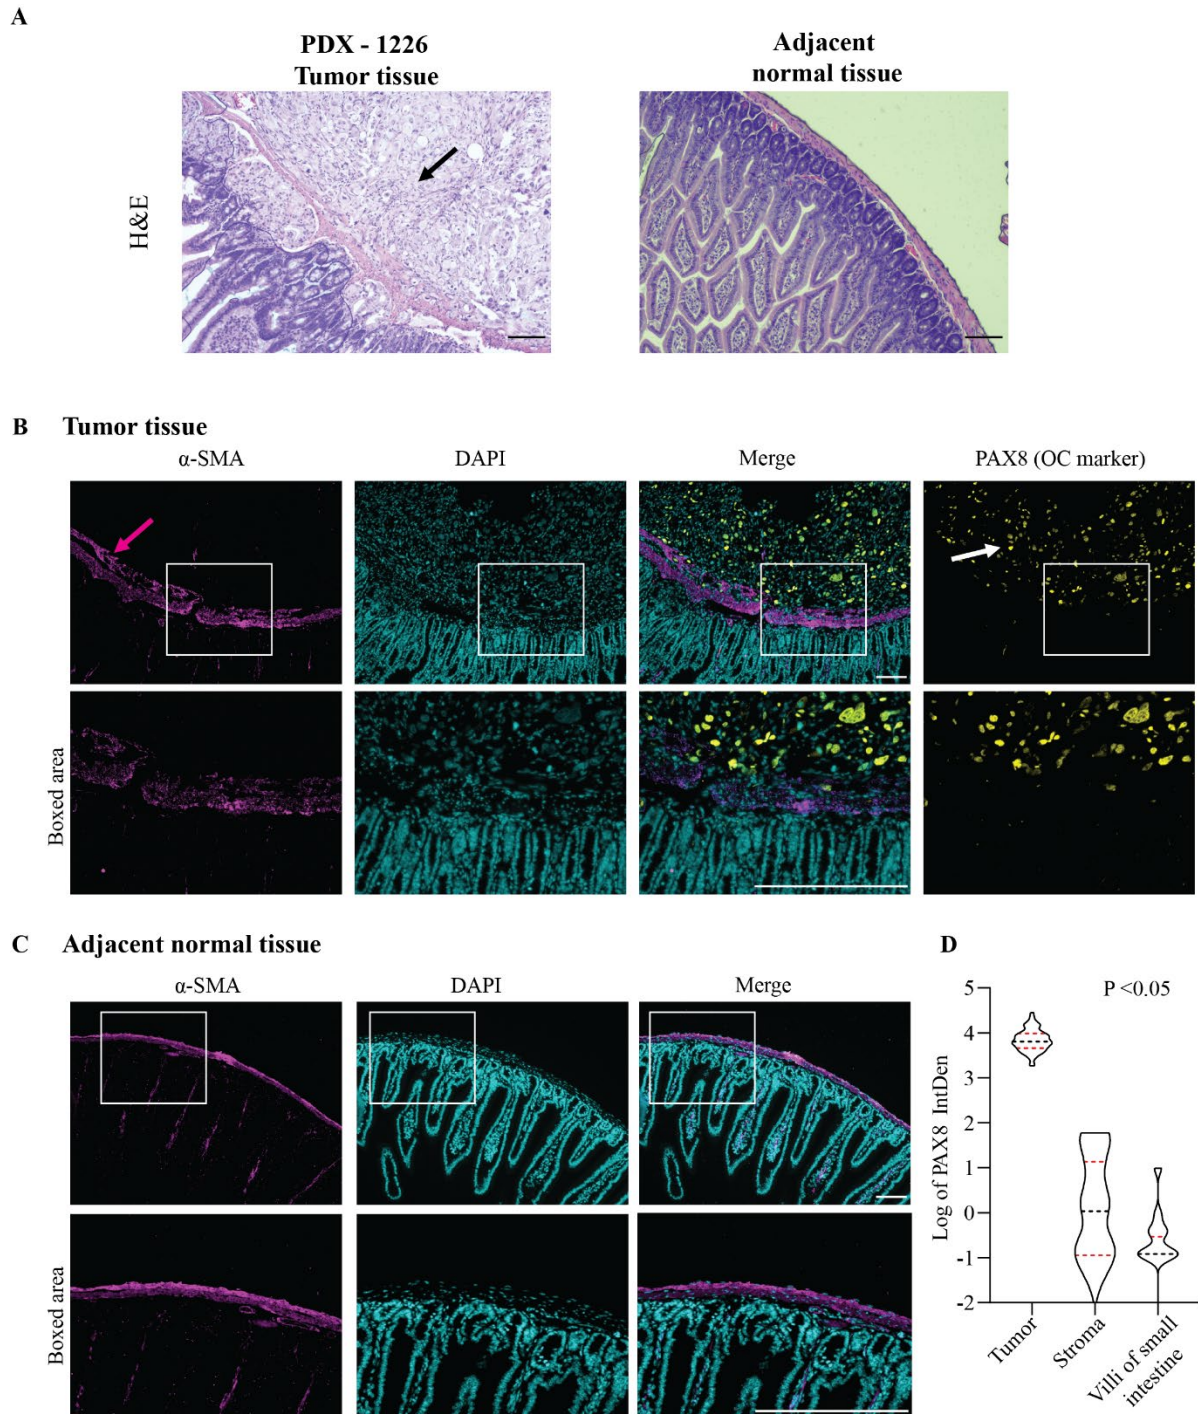

873 **S. Figure 8.** PDX-1226 growing tumor on the surface of the small intestine. (A) H&E of tumor nests (black  
874 arrow) and adjacent normal tissues. (B) Immunofluorescence of alpha smooth muscle actin ( $\alpha$ -SMA) (magenta  
875 arrows), DAPI, PAX8 (white arrows) in tumor section. (C) Immunofluorescence of  $\alpha$ -SMA and DAPI in adjacent  
876 normal tissue. Scale bars are 100  $\mu$ m. (D) Quantification of PAX8 fluorescence intensity (integrated density).  
877 Each data point represents one region of interest (ROI). Total ROIs: tumor 66, stroma 20, and villi 20. All data  
878 points are shown as median and quartiles. An ordinary one-way ANOVA test was used to examine statistical  
879 differences between data sets. ANOVA was followed by Tukey post-hoc analysis; Tumor vs. Stroma P < 0.001,  
880 Tumor vs. Villi small intestine P < 0.001, Stroma vs. Villi small intestine P > 0.999.  
881

882 **Supplementary Movies.**

883 **MOVIE 1.** Outgrowth formation by FNE-m-p53 spheroids reconstituted with 2% MG. Cell  
884 clusters were imaged for 5 days at 2-hr intervals.

885 **MOVIE 2.** Outgrowth formation by Hey-A8 spheroids reconstituted with 2% MG. Cell  
886 clusters were imaged for 5 days at 2-hr intervals.

887 **MOVIE 3.** Outgrowth formation by Tyk-nu spheroids reconstituted with 2% MG. Cell clusters  
888 were imaged for 5 days at 2-hr intervals.

889 **MOVIE 4.** FNE-m-p53-GFP cell proliferation in 2% and 25% MG. Images were obtained  
890 every 22 minutes for a duration of 61 hrs.

891 **MOVIE 5.** Hey-A8-mKO2 cell proliferation in 2% and 25% MG. Images were obtained every  
892 22 minutes for a duration of 68 hrs.

893 **MOVIE 6.** Evolution of trajectories made by FNE-m-p53-GFP monolayer cultures overlaid  
894 with 2% or 25% MG. Images were obtained every 20 minutes for a duration of 61 hours. First  
895 frame of the movie corresponds to 13-hour time point.

896 **MOVIE 7.** Evolution of cell movement trajectories in Hey-A8-mKO2 monolayer cultures  
897 overlaid with 2% or 25% MG. Images were obtained every 15 minutes for a duration of 68  
898 hours. First frame of the movie corresponds to 20-hour time point.

899 **References**

- 900 1. Kurman RJ, Shih IM. The origin and pathogenesis of epithelial ovarian cancer: a proposed  
901 unifying theory. *Am J Surg Pathol* [Internet] 2010 [cited 2022 Apr 16];34(3):433–43. Available  
902 from: <https://pubmed.ncbi.nlm.nih.gov/20154587/>
- 903 2. Auersperg N. Ovarian surface epithelium as a source of ovarian cancers: unwarranted  
904 speculation or evidence-based hypothesis? *Gynecol Oncol* [Internet] 2013 [cited 2022 Apr  
905 16];130(1):246–51. Available from: <https://pubmed.ncbi.nlm.nih.gov/23558054/>
- 906 3. Folkins AK, Jarboe EA, Saleemuddin A, Lee Y, Callahan MJ, Drapkin R, et al. A candidate  
907 precursor to pelvic serous cancer (p53 signature) and its prevalence in ovaries and fallopian  
908 tubes from women with BRCA mutations. *Gynecol Oncol* [Internet] 2008 [cited 2022 Apr  
909 16];109(2):168–73. Available from: <https://pubmed.ncbi.nlm.nih.gov/18342932/>

- 910 4. Meserve EEK, Brouwer J, Crum CP. Serous tubal intraepithelial neoplasia: the concept and its  
911 application. *Mod Pathol* [Internet] 2017 [cited 2022 Apr 16];30(5):710–21. Available from:  
912 <https://pubmed.ncbi.nlm.nih.gov/28106106/>
- 913 5. Karst AM, Drapkin R. Ovarian cancer pathogenesis: a model in evolution. *J Oncol* [Internet]  
914 2010 [cited 2022 Apr 16];2010:1–13. Available from:  
915 <https://pubmed.ncbi.nlm.nih.gov/19746182/>
- 916 6. Lengyel E. Ovarian cancer development and metastasis. *Am J Pathol* [Internet] 2010 [cited 2022  
917 Apr 16];177(3):1053–64. Available from: <https://pubmed.ncbi.nlm.nih.gov/20651229/>
- 918 7. Ahmed N, Stenvers KL. Getting to know ovarian cancer ascites: opportunities for targeted  
919 therapy-based translational research. *Front Oncol* [Internet] 2013 [cited 2022 Apr 16];3.  
920 Available from: <https://pubmed.ncbi.nlm.nih.gov/24093089/>
- 921 8. Iwanicki MP, Chen HY, Iavarone C, Zervantonakis IK, Muranen T, Novak M, et al. Mutant p53  
922 regulates ovarian cancer transformed phenotypes through autocrine matrix deposition. *JCI*  
923 *Insight* [Internet] 2016 [cited 2022 Apr 16];1(10):86829. Available from:  
924 </pmc/articles/PMC4963159/>
- 925 9. Li X, Qian H, Takizawa M, Koga H, Tsuchisaka A, Ishii N, et al. N-linked glycosylation on  
926 laminin  $\gamma 1$  influences recognition of anti-laminin  $\gamma 1$  pemphigoid autoantibodies. *Journal of*  
927 *Dermatological Science* [Internet] 2015 [cited 2022 Apr 16];77(2):125–9. Available from:  
928 <http://www.jdsjournal.com/article/S0923181114003016/fulltext>
- 929 10. Hennet T. Collagen glycosylation. *Current Opinion in Structural Biology* 2019;56:131–8.
- 930 11. Chen D, Roberts R, Pohl M, Nigam S, Kreidberg J, Wang Z, et al. Differential expression of  
931 collagen- and laminin-binding integrins mediates ureteric bud and inner medullary collecting  
932 duct cell tubulogenesis. *American Journal of Physiology - Renal Physiology* [Internet] 2004  
933 [cited 2022 Apr 16];287(4 56-4):602–11. Available from:  
934 <https://journals.physiology.org/doi/full/10.1152/ajprenal.00015.2004>
- 935 12. Chen CS, Tan J, Tien J. Mechanotransduction at Cell-Matrix and Cell-Cell Contacts.  
936 <http://dx.doi.org/10.1146/annurev.bioeng6040803140040> [Internet] 2004 [cited 2022 Apr  
937 16];6:275–302. Available from:  
938 <https://www.annualreviews.org/doi/abs/10.1146/annurev.bioeng.6.040803.140040>
- 939 13. Orr AW, Helmke BP, Blackman BR, Schwartz MA. Mechanisms of mechanotransduction. *Dev*  
940 *Cell* [Internet] 2006 [cited 2022 Apr 16];10(1):11–20. Available from:  
941 <https://pubmed.ncbi.nlm.nih.gov/16399074/>
- 942 14. Wang C, Brisson BK, Terajima M, Li Q, Hoxha K, Han B, et al. Type III collagen is a key  
943 regulator of the collagen fibrillar structure and biomechanics of articular cartilage and meniscus.  
944 *Matrix Biology* 2020;85–86:47–67.



- 945 15. Spofford CM, Chilian WM. Mechanotransduction via the elastin-laminin receptor (ELR) in  
946 resistance arteries. *J Biomech* [Internet] 2003 [cited 2022 Apr 16];36(5):645–52. Available  
947 from: <https://pubmed.ncbi.nlm.nih.gov/12694994/>
- 948 16. Banno A, Ginsberg MH. Integrin activation. *Biochemical Society Transactions* [Internet] 2008  
949 [cited 2022 Apr 16];36(2):229–34. Available from:  
950 </biochemsoctrans/article/36/2/229/83770/Integrin-activation>
- 951 17. Schwartz MA, Shattil SJ. Signaling networks linking integrins and Rho family GTPases. *Trends*  
952 *in Biochemical Sciences* 2000;25(8):388–91.
- 953 18. Fields B, DeLaForest A, Zogg M, May J, Hagen C, Komnick K, et al. The Adult Murine Intestine  
954 is Dependent on Constitutive Laminin- $\gamma$ 1 Synthesis. *Scientific Reports* 2019 9:1 [Internet] 2019  
955 [cited 2022 Apr 16];9(1):1–12. Available from: [https://www.nature.com/articles/s41598-019-](https://www.nature.com/articles/s41598-019-55844-x)  
956 [55844-x](https://www.nature.com/articles/s41598-019-55844-x)
- 957 19. Willem M, Miosge N, Halfter W, Smyth N, Jannetti I, Burghart E, et al. Specific ablation of the  
958 nidogen-binding site in the laminin  $\gamma$ 1 chain interferes with kidney and lung development.  
959 *Development* [Internet] 2002 [cited 2022 Apr 16];129(11):2711–22. Available from:  
960 [https://journals.biologists.com/dev/article/129/11/2711/41683/Specific-ablation-of-the-](https://journals.biologists.com/dev/article/129/11/2711/41683/Specific-ablation-of-the-nidogen-binding-site-in)  
961 [nidogen-binding-site-in](https://journals.biologists.com/dev/article/129/11/2711/41683/Specific-ablation-of-the-nidogen-binding-site-in)
- 962 20. Jailkhani N, Ingram JR, Rashidian M, Rickelt S, Tian C, Mak H, et al. Noninvasive imaging of  
963 tumor progression, metastasis, and fibrosis using a nanobody targeting the extracellular matrix.  
964 *Proc Natl Acad Sci U S A* 2019;116(28):14181–90.
- 965 21. Winkler J, Abisoye-Ogunniyan A, Metcalf KJ, Werb Z. Concepts of extracellular matrix  
966 remodelling in tumour progression and metastasis. *Nature Communications* 2020 11:1 [Internet]  
967 2020 [cited 2022 Apr 16];11(1):1–19. Available from: [https://www.nature.com/articles/s41467-](https://www.nature.com/articles/s41467-020-18794-x)  
968 [020-18794-x](https://www.nature.com/articles/s41467-020-18794-x)
- 969 22. Kuhn E, Kurman RJ, Soslow RA, Han G, Sehdev AS, Morin PJ, et al. The diagnostic and  
970 biological implications of laminin expression in serous tubal intraepithelial carcinoma. *Am J*  
971 *Surg Pathol* [Internet] 2012 [cited 2022 Apr 16];36(12):1826. Available from:  
972 </pmc/articles/PMC3500426/>
- 973 23. Rentchler EC, Gant KL, Drapkin R, Patankar M, Campagnola PJ. Imaging Collagen Alterations  
974 in STICs and High Grade Ovarian Cancers in the Fallopian Tubes by Second Harmonic  
975 Generation Microscopy. *Cancers* 2019, Vol 11, Page 1805 [Internet] 2019 [cited 2022 Apr  
976 16];11(11):1805. Available from: <https://www.mdpi.com/2072-6694/11/11/1805/htm>
- 977 24. Benton G, Arnaoutova I, George J, Kleinman HK, Koblinski J. Matrigel: From discovery and  
978 ECM mimicry to assays and models for cancer research. *Advanced Drug Delivery Reviews*  
979 2014;79–80:3–18.

- 980 25. Mroue R, Bissell MJ. Three-Dimensional Cultures of Mouse Mammary Epithelial Cells.  
981 Methods in Molecular Biology [Internet] 2012 [cited 2022 Apr 16];945:221–50. Available from:  
982 [https://link.springer.com/protocol/10.1007/978-1-62703-125-7\\_14](https://link.springer.com/protocol/10.1007/978-1-62703-125-7_14)
- 983 26. Farsinejad S, Cattabiani T, Muranen T, Iwanicki M. Ovarian Cancer Dissemination—A Cell  
984 Biologist’s Perspective. *Cancers* 2019, Vol 11, Page 1957 [Internet] 2019 [cited 2022 Apr  
985 16];11(12):1957. Available from: <https://www.mdpi.com/2072-6694/11/12/1957/htm>
- 986 27. Muranen T, Selfors LM, Worster DT, Iwanicki MP, Song L, Morales FC, et al. Inhibition of  
987 PI3K/mTOR Leads to Adaptive Resistance in Matrix-Attached Cancer Cells. *Cancer Cell*  
988 2012;21(2):227–39.
- 989 28. Zhang S, Dolgalev I, Zhang T, Ran H, Levine DA, Neel BG. Both fallopian tube and ovarian  
990 surface epithelium are cells-of-origin for high-grade serous ovarian carcinoma. *Nature*  
991 *Communications* 2019 10:1 [Internet] 2019 [cited 2022 Apr 16];10(1):1–16. Available from:  
992 <https://www.nature.com/articles/s41467-019-13116-2>
- 993 29. Zhang S, Iyer S, Ran H, Dolgalev I, Gu S, Wei W, et al. Genetically defined, syngeneic organoid  
994 platform for developing combination therapies for ovarian cancer. *Cancer Discovery* [Internet]  
995 2021 [cited 2022 Apr 16];11(2):362–83. Available from:  
996 [https://aacrjournals.org/cancerdiscovery/article/11/2/362/3255/Genetically-Defined-](https://aacrjournals.org/cancerdiscovery/article/11/2/362/3255/Genetically-Defined-Syngeneic-Organoid-Platform)  
997 [Syngeneic-Organoid-Platform](https://aacrjournals.org/cancerdiscovery/article/11/2/362/3255/Genetically-Defined-Syngeneic-Organoid-Platform)
- 998 30. Hill SJ, Decker B, Roberts EA, Horowitz NS, Muto MG, Worley MJ, et al. Prediction of DNA  
999 repair inhibitor response in short-term patient-derived ovarian cancer organoids. *AACR*  
1000 [Internet] [cited 2022 Apr 16];Available from:  
1001 <https://cancerdiscovery.aacrjournals.org/content/8/11/1404.abstract>
- 1002 31. Hoffmann K, Berger H, Kulbe H, Thillainadarasan S, Mollenkopf H, Zemojtel T, et al. Stable  
1003 expansion of high-grade serous ovarian cancer organoids requires a low-Wnt environment. *The*  
1004 *EMBO Journal* 2020;39(6).
- 1005 32. McPherson A, Roth A, Laks E, Masud T, Bashashati A, Zhang AW, et al. Divergent modes of  
1006 clonal spread and intraperitoneal mixing in high-grade serous ovarian cancer. *Nat Genet*  
1007 [Internet] 2016 [cited 2022 Jun 29];48(7):758–67. Available from:  
1008 <https://pubmed.ncbi.nlm.nih.gov/27182968/>
- 1009 33. Lee YY, Kim YJ, Gil ES, Kim H, Jang JH, Choung YH. Type 1 Diabetes Induces Hearing Loss:  
1010 Functional and Histological Findings in An Akita Mouse Model. *Biomedicines* 2020, Vol 8,  
1011 Page 343 [Internet] 2020 [cited 2022 Feb 26];8(9):343. Available from:  
1012 <https://www.mdpi.com/2227-9059/8/9/343/htm>
- 1013 34. Wegner K, ... AK... of H&, 2017 undefined. Fluorescence of picosirius red multiplexed with  
1014 immunohistochemistry for the quantitative assessment of collagen in tissue sections.  
1015 *journals.sagepub.com* [Internet] 2017 [cited 2022 Apr 16];65(8):479–90. Available from:  
1016 <https://journals.sagepub.com/doi/abs/10.1369/0022155417718541>

- 1017 35. Kleinman HK, McGarvey ML, Hassell JR, Star VL, Cannon FB, Laurie GW, et al. Basement  
1018 membrane complexes with biological activity. *Biochemistry* [Internet] 1986 [cited 2022 Apr  
1019 16];25(2):312–8. Available from: <https://pubmed.ncbi.nlm.nih.gov/2937447/>
- 1020 36. Martin GR, Timpl R, Kühn K. Basement membrane proteins: molecular structure and function.  
1021 *Adv Protein Chem* [Internet] 1988 [cited 2022 Apr 16];39(C):1–50. Available from:  
1022 <https://pubmed.ncbi.nlm.nih.gov/3149870/>
- 1023 37. Aisenbrey EA, Murphy WL. Synthetic alternatives to Matrigel. *Nature Reviews Materials* 2020  
1024 5:7 [Internet] 2020 [cited 2022 Apr 16];5(7):539–51. Available from:  
1025 <https://www.nature.com/articles/s41578-020-0199-8>
- 1026 38. Domcke S, Sinha R, Levine DA, Sander C, Schultz N. Evaluating cell lines as tumour models  
1027 by comparison of genomic profiles. *Nat Commun* [Internet] 2013 [cited 2022 Apr 16];4.  
1028 Available from: <https://pubmed.ncbi.nlm.nih.gov/23839242/>
- 1029 39. Davidowitz RA, Iwanicki MP, Brugge JS. In vitro Mesothelial Clearance Assay that Models the  
1030 Early Steps of Ovarian Cancer Metastasis. *Journal of Visualized Experiments : JoVE* [Internet]  
1031 2012 [cited 2022 Jun 23];(60):3888. Available from: </pmc/articles/PMC3466628/>
- 1032 40. Iwanicki MP, Davidowitz RA, Ng MR, Besser A, Muranen T, Merritt M, et al. Ovarian cancer  
1033 spheroids use myosin-generated force to clear the mesothelium. *Cancer Discovery* [Internet]  
1034 2011 [cited 2022 Apr 16];1(2):144–57. Available from:  
1035 [https://aacrjournals.org/cancerdiscovery/article/1/2/144/2263/Ovarian-Cancer-Spheroids-Use-](https://aacrjournals.org/cancerdiscovery/article/1/2/144/2263/Ovarian-Cancer-Spheroids-Use-Myosin-Generated)  
1036 [Myosin-Generated](https://aacrjournals.org/cancerdiscovery/article/1/2/144/2263/Ovarian-Cancer-Spheroids-Use-Myosin-Generated)
- 1037 41. LeCluyse EL, Bullock PL, Parkinson A, Hochman JH. Cultured rat hepatocytes. *Pharm*  
1038 *Biotechnol* 1996;8:121–59.
- 1039 42. Borries M, Barooji YF, Yennek S, Grapin-Botton A, Berg-Sørensen K, Oddershede LB.  
1040 Quantification of Visco-Elastic Properties of a Matrigel for Organoid Development as a  
1041 Function of Polymer Concentration. *Frontiers in Physics* 2020;8:475.
- 1042 43. Barriga E, Biology RMS in C& D, 2019 undefined. Adjustable viscoelasticity allows for  
1043 efficient collective cell migration. *Elsevier* [Internet] [cited 2022 Apr 16];Available from:  
1044 <https://www.sciencedirect.com/science/article/pii/S1084952117305505>
- 1045 44. migration MAC adhesion &, 2013 undefined. The laminin family. *Taylor & Francis* [Internet]  
1046 2013 [cited 2022 Apr 16];7(1):48–55. Available from:  
1047 <https://www.tandfonline.com/doi/abs/10.4161/cam.22826>
- 1048 45. in PYCSH perspectives, 2011 undefined. Basement membranes: cell scaffoldings and signaling  
1049 platforms. *cshperspectives.cshlp.org* [Internet] [cited 2022 Apr 16];Available from:  
1050 <https://cshperspectives.cshlp.org/content/3/2/a004911.short>
- 1051 46. Kyprianou C, Christodoulou N, Nature RH, 2020 undefined. Basement membrane remodelling  
1052 regulates mouse embryogenesis. *nature.com* [Internet] [cited 2022 Apr 16];Available from:  
1053 [https://idp.nature.com/authorize/casa?redirect\\_uri=https://www.nature.com/articles/s41586-](https://idp.nature.com/authorize/casa?redirect_uri=https://www.nature.com/articles/s41586-)

- 1054 020-2264-2&casa\_token=KJ1B8x3SFB0AAAAA:f3sEXt-R5JznY2l-  
1055 R\_brrEC4otGF3VzFdVumgZ4qkEaT\_CPZP8dDZI01p3JfuWudLgZ1V-m32vfOPPd  
1056 47. Delaine-Smith R, Maniati E, Malacrida B, iScience SN, 2021 undefined. Modelling TGF $\beta$ R and  
1057 Hh pathway regulation of prognostic matrisome molecules in ovarian cancer. Elsevier [Internet]  
1058 [cited 2022 Apr 16]; Available from:  
1059 <https://www.sciencedirect.com/science/article/pii/S2589004221006428>  
1060 48. Raspanti M, Viola M, Sonaggere M, Tira ME, Tenni R. Collagen fibril structure is affected by  
1061 collagen concentration and decorin. *Biomacromolecules* 2007;8(7):2087–91.  
1062 49. Fraley SI, Wu PH, He L, Feng Y, Krisnamurthy R, Longmore GD, et al. Three-dimensional  
1063 matrix fiber alignment modulates cell migration and MT1-MMP utility by spatially and  
1064 temporally directing protrusions. *Sci Rep* [Internet] 2015 [cited 2022 Jun 30];5. Available from:  
1065 <https://pubmed.ncbi.nlm.nih.gov/26423227/>  
1066 50. Hsu YM, Chen CN, Chiu JJ, Chang SH, Wang YJ. The effects of fiber size on MG63 cells  
1067 cultured with collagen based matrices. *J Biomed Mater Res B Appl Biomater* [Internet] 2009  
1068 [cited 2022 Jun 30];91(2):737–45. Available from: <https://pubmed.ncbi.nlm.nih.gov/19572296/>  
1069 51. Jana A, Nookaew I, Singh J, Behkam B, Franco AT, Nain AS. Crosshatch nanofiber networks  
1070 of tunable interfiber spacing induce plasticity in cell migration and cytoskeletal response.  
1071 *FASEB J* [Internet] 2019 [cited 2022 Jun 29];33(10):10618–32. Available from:  
1072 <https://pubmed.ncbi.nlm.nih.gov/31225977/>  
1073 52. Plou J, Juste-Lanas Y, Olivares V, del Amo C, Borau C, García-Aznar JM. From individual to  
1074 collective 3D cancer dissemination: roles of collagen concentration and TGF- $\beta$ . *Scientific*  
1075 *Reports* 2018 8:1 [Internet] 2018 [cited 2022 Apr 16];8(1):1–14. Available from:  
1076 <https://www.nature.com/articles/s41598-018-30683-4>  
1077 53. Palecek SP, Loftust JC, Ginsberg MH, Lauffenburger DA, Horwitz AF. Integrin-ligand binding  
1078 properties govern cell migration speed through cell-substratum adhesiveness. *nature.com*  
1079 [Internet] 1997 [cited 2022 Apr 16];385:3–4. Available from:  
1080 [https://idp.nature.com/authorize/casa?redirect\\_uri=https://www.nature.com/articles/385537a0](https://idp.nature.com/authorize/casa?redirect_uri=https://www.nature.com/articles/385537a0)  
1081 &casa\_token=QdaKLV0-wYMAAAAA:-zD\_b-  
1082 jDXRhWSxrg\_emp9Xbz4bie6fCYxwIxGhfAofl7yWSxJ7P-  
1083 AbNylrH11Fkq3\_1YJgtbWjAKpQeh  
1084 54. Webb D, Parsons J, biology AHN cell, 2002 undefined. Adhesion assembly, disassembly and  
1085 turnover in migrating cells—over and over and over again. *nature.com* [Internet] [cited 2022 Apr  
1086 16]; Available from:  
1087 [https://idp.nature.com/authorize/casa?redirect\\_uri=https://www.nature.com/articles/ncb0402-](https://idp.nature.com/authorize/casa?redirect_uri=https://www.nature.com/articles/ncb0402-e97&casa_token=pa9fRR9BiQQAAAAA:Gz9cG7n0gv7gkC8_nvIqr2H5YIIKKVaiVXXXQ6iy)  
1088 [e97&casa\\_token=pa9fRR9BiQQAAAAA:Gz9cG7n0gv7gkC8\\_nvIqr2H5YIIKKVaiVXXXQ6iy](https://idp.nature.com/authorize/casa?redirect_uri=https://www.nature.com/articles/ncb0402-e97&casa_token=pa9fRR9BiQQAAAAA:Gz9cG7n0gv7gkC8_nvIqr2H5YIIKKVaiVXXXQ6iy)  
1089 [aHwS6KqLIAHDNzgHc-cCmUPX9eJEkouRHzyRqXQEE](https://idp.nature.com/authorize/casa?redirect_uri=https://www.nature.com/articles/ncb0402-e97&casa_token=pa9fRR9BiQQAAAAA:Gz9cG7n0gv7gkC8_nvIqr2H5YIIKKVaiVXXXQ6iy)

- 1090 55. Chaudhuri O, Cooper-White J, Janmey P, Nature DM, 2020 undefined. Effects of extracellular  
1091 matrix viscoelasticity on cellular behaviour. nature.com [Internet] [cited 2022 Apr 16];Available  
1092 from:  
1093 [https://idp.nature.com/authorize/casa?redirect\\_uri=https://www.nature.com/articles/s41586-](https://idp.nature.com/authorize/casa?redirect_uri=https://www.nature.com/articles/s41586-020-2612-2&casa_token=LV6_Z_5X_HYAAAAA:NGvuLkWvRaBl-3DycCu9ngnlNkM_3BO3bqsoTQiAibF2B6UUZLQbaXsN-jJfW3UX-717VCKZELv9N9Ny)  
1094 [020-2612-2&casa\\_token=LV6\\_Z\\_5X\\_HYAAAAA:NGvuLkWvRaBl-](https://idp.nature.com/authorize/casa?redirect_uri=https://www.nature.com/articles/s41586-020-2612-2&casa_token=LV6_Z_5X_HYAAAAA:NGvuLkWvRaBl-3DycCu9ngnlNkM_3BO3bqsoTQiAibF2B6UUZLQbaXsN-jJfW3UX-717VCKZELv9N9Ny)  
1095 [3DycCu9ngnlNkM\\_3BO3bqsoTQiAibF2B6UUZLQbaXsN-jJfW3UX-717VCKZELv9N9Ny](https://idp.nature.com/authorize/casa?redirect_uri=https://www.nature.com/articles/s41586-020-2612-2&casa_token=LV6_Z_5X_HYAAAAA:NGvuLkWvRaBl-3DycCu9ngnlNkM_3BO3bqsoTQiAibF2B6UUZLQbaXsN-jJfW3UX-717VCKZELv9N9Ny)
- 1096 56. Chaudhuri O, Koshy ST, Branco Da Cunha C, Shin JW, Verbeke CS, Allison KH, et al.  
1097 Extracellular matrix stiffness and composition jointly regulate the induction of malignant  
1098 phenotypes in mammary epithelium. Nat Mater [Internet] 2014 [cited 2022 Apr 16];13(10):970–  
1099 8. Available from: <https://pubmed.ncbi.nlm.nih.gov/24930031/>
- 1100 57. Byers L, Osborne J, Carson L, Carter J, letters AHC, 1995 undefined. Increased levels of laminin  
1101 in ascitic fluid of patients with ovarian cancer. Elsevier [Internet] [cited 2022 Apr 16];Available  
1102 from: <https://www.sciencedirect.com/science/article/pii/030438359403625S>
- 1103 58. Maniati E, Berlato C, Gopinathan G, Heath O, Kotantaki P, Lakhani A, et al. Mouse Ovarian  
1104 Cancer Models Recapitulate the Human Tumor Microenvironment and Patient Response to  
1105 Treatment. Cell Rep [Internet] 2020 [cited 2022 Jun 30];30(2):525-540.e7. Available from:  
1106 <https://pubmed.ncbi.nlm.nih.gov/31940494/>
- 1107 59. Ince TA, Richardson AL, Bell GW, Saitoh M, Godar S, Karnoub AE, et al. Transformation of  
1108 different human breast epithelial cell types leads to distinct tumor phenotypes. Cancer Cell  
1109 [Internet] 2007 [cited 2022 Jun 23];12(2):160–70. Available from:  
1110 <https://pubmed.ncbi.nlm.nih.gov/17692807/>
- 1111 60. Uphoff CC, Drexler HG. Detection of Mycoplasma Contaminations. Methods in Molecular  
1112 Biology [Internet] 2013 [cited 2022 Apr 16];946:1–13. Available from:  
1113 [https://link.springer.com/protocol/10.1007/978-1-62703-128-8\\_1](https://link.springer.com/protocol/10.1007/978-1-62703-128-8_1)
- 1114 61. Lee Y, Kim Y, Gil E, Kim H, Jang J, Biomedicines YC, et al. Type 1 Diabetes Induces Hearing  
1115 Loss: Functional and Histological Findings in An Akita Mouse Model. mdpi.com [Internet]  
1116 [cited 2022 Apr 16];Available from: <https://www.mdpi.com/823960>
- 1117 62. Schindelin J, Arganda-Carreras I, Frise E, ... VKN, 2012 undefined. Fiji: an open-source  
1118 platform for biological-image analysis. nature.com [Internet] [cited 2022 Apr 16];Available  
1119 from: <https://www.nature.com/articles/nmeth.2019>
- 1120 63. Wang S, Liu CH, Zakharov VP, Lazar AJ, Pollock RE, Larin K v. Three-dimensional  
1121 computational analysis of optical coherence tomography images for the detection of soft tissue  
1122 sarcomas. spiedigitallibrary.org [Internet] 2014 [cited 2022 Apr 16];19(2):021102. Available  
1123 from: [https://www.spiedigitallibrary.org/journals/journal-of-biomedical-optics/volume-](https://www.spiedigitallibrary.org/journals/journal-of-biomedical-optics/volume-19/issue-2/021102/Three-dimensional-computational-analysis-of-optical-coherence-tomography-images-for/10.1117/1.JBO.19.2.021102.short)  
1124 [19/issue-2/021102/Three-dimensional-computational-analysis-of-optical-coherence-](https://www.spiedigitallibrary.org/journals/journal-of-biomedical-optics/volume-19/issue-2/021102/Three-dimensional-computational-analysis-of-optical-coherence-tomography-images-for/10.1117/1.JBO.19.2.021102.short)  
1125 [tomography-images-for/10.1117/1.JBO.19.2.021102.short](https://www.spiedigitallibrary.org/journals/journal-of-biomedical-optics/volume-19/issue-2/021102/Three-dimensional-computational-analysis-of-optical-coherence-tomography-images-for/10.1117/1.JBO.19.2.021102.short)

- 1126 64. Tinevez J, Perry N, Schindelin J, Methods GH, 2017 undefined. TrackMate: An open and  
1127 extensible platform for single-particle tracking. Elsevier [Internet] [cited 2022 Apr  
1128 16];Available from: <https://www.sciencedirect.com/science/article/pii/S1046202316303346>  
1129 65. Wagner T, Kroll A, Haramagatti CR, Lipinski HG, Wiemann M. Classification and  
1130 segmentation of nanoparticle diffusion trajectories in cellular micro environments. PLoS ONE  
1131 2017;12(1).
